# Supplementary material for: Early and long-term results of minimally invasive mitral valve surgery through a right mini-thoracotomy approach: a retrospective propensity-score matched analysis
Source: PeerJ. 2018 May 28;6:e4810. doi: 10.7717/peerj.4810 (PMC5978402; doi:10.7717/peerj.4810)
Supplement: Supplemental Information 1 [file peerj-06-4810-s001.xlsx]

## Sheet: Carpentier
Number		Approach median sternotomy 0 no 1 yes 2 conversion to other approach	sex 1 male 2 female	age in year	in-hospital death	decreased capacity	decreased capacity since days	exertional angina pectoris	exertional angina pectoris since days	unstable angina	unstable angina since days	exertional dyspnea	exertional dyspnea since days	dyspnea at rest	dyspnea at rest since days	peripheral edemata	peripheral edemata since days	acute myokardinfarction	infarction x days before	Syncope	Syncope x days before	embolism	embolism x days before	cardiac decompensation	cardiac decompensation x days before	status post resuscitation	resuscitation x days before	status post stroke	stroke x days before	Preoperative intubation	Preoperative IABP/Assistsystem		Preoperative NYHA Classification	Preoperative ASA (American socitey of anesthesiologists)	Family anlage 0 no 1 yes 9 unknown	diabetes 0 no 1 diet therapy 2 tablets therapy 3 insulin therapy 4 untreated 9 unknown	hyperlipidaemia 0 no 1 yes untreated 2 yeas with therapy 9 unknown	hypertension 0 no 1 yes untreated 2 yes with therapy 9 unknown	pulmonary hypertension 0 no 1 31-55 mmHg 2 > 55 mmHg 9 unknown	hyperuricaemia 0 no 1 yes 9 unknown	smoking 0 no 1 current 2 ex-smoking 9 unknown	numbors of previous operations (heart and aorta ascendens)	last heart operation x days before	previous operation 1 in our clinic 2 elswhere	previous operation CABG 0 no 1 yes 9 unknown	previous operation valve 0 no 1 yes 9 unknown	previous operation on mitral valve 0 no 1 yes 9 unknown	previous operation tricuspidal valve 0 no 1 yes 9 unknown	previous operation pulmonal valve 0no 1 yes 9 unknown
1		1	1	51	0	0	0	1	154	0	0	1	154	0	0	0	0	0	0	0	0	0	0	0	0	0	0	0	0	0	0		2	3	1	0	0	0	0	0	0	0	0	0	0	0	0	0	0
2		1	1	55	0	1	34	1	39	0	0	1	39	1	34	0	0	0	0	0	0	0	0	0	0	0	0	0	0	0	0		3	0	0	0	0	2	0	0	1	0	0	0	0	0	0	0	0
3		0	1	86	0	1	0	1	0	0	0	1	0	1	0	1	0	0	0	0	0	0	0	0	0	0	0	0	0	0	0		3	3	0	0	0	2	1	1	0	1	5310	1	1	1	0	0	0
4		0	1	57	0	1	0	0	0	0	0	0	0	0	0	0	0	0	0	0	0	0	0	0	0	0	0	0	0	0	0		3	3	0	0	2	2	0	0	0	0	0	0	0	0	0	0	0
5		1	2	60	0	1	233	0	0	0	0	1	233	1	112	1	112	0	0	0	0	0	0	0	0	0	0	0	0	0	0		4	0	0	0	0	2	1	0	0	2	5196	1	0	1	0	0	0
6		0	2	51	0	0	0	0	0	0	0	1	0	1	0	0	0	0	0	0	0	0	0	0	0	0	0	0	0	0	0		4	3	0	0	2	2	0	0	0	0	0	0	0	0	0	0	0
7		1	2	70	0	1	0	1	10	0	0	1	10	0	0	0	0	0	0	0	0	0	0	1	9	0	0	0	0	0	0		3	3	0	0	1	2	1	0	0	0	0	0	0	0	0	0	0
8		0	1	57	0	1	15	0	0	0	0	1	0	0	0	0	0	0	0	0	0	0	0	0	0	0	0	0	0	0	0		2	0	1	0	2	2	1	0	2	0	0	0	0	0	0	0	0
9		0	1	40	0	0	0	0	0	0	0	0	0	0	0	0	0	0	0	0	0	0	0	0	0	0	0	0	0	0	0		3	3	0	0	2	2	0	0	1	0	0	0	0	0	0	0	0
10		1	1	68	0	1	94	0	0	0	0	1	0	0	0	0	0	1	94	0	0	0	0	0	0	0	0	0	0	0	0		2	0	0	3	2	2	1	0	2	0	0	0	0	0	0	0	0
11		0	2	68	0	1	0	0	0	0	0	1	0	0	0	1	0	0	0	0	0	0	0	0	0	0	0	0	0	0	0		3	3	1	0	0	2	1	0	0	0	0	0	0	0	0	0	0
12		0	1	70	0	1	327	0	0	0	0	1	448	0	0	0	0	0	0	1	1543	0	0	0	0	0	0	3	28	0	0		3	3	0	0	0	0	1	0	0	0	0	0	0	0	0	0	0
13		1	1	55	0	1	0	0	0	0	0	0	0	0	0	0	0	0	0	0	0	0	0	0	0	0	0	0	0	0	0		3	3	0	0	0	2	1	0	0	0	0	0	0	0	0	0	0
14		1	2	71	0	1	0	1	0	0	0	1	0	0	0	0	0	0	0	0	0	0	0	1	25	0	0	3	12	0	0		3	3	9	0	0	2	0	0	0	0	0	0	0	0	0	0	0
15		0	2	53	0	1	0	0	0	0	0	1	0	0	0	0	0	0	0	0	0	0	0	0	0	0	0	0	0	0	0		3	3	0	0	0	0	0	0	0	0	0	0	0	0	0	0	0
16		1	2	76	1	1	60	1	0	1	60	1	0	0	0	0	0	0	0	0	0	0	0	0	0	0	0	0	0	0	0		3	4	0	0	0	2	1	0	0	0	0	0	0	0	0	0	0
17		0	1	41	0	0	0	0	0	0	0	0	0	0	0	0	0	0	0	0	0	0	0	0	0	0	0	0	0	0	0		3	3	0	0	2	2	0	0	1	0	0	0	0	0	0	0	0
18		1	2	45	0	1	0	0	0	0	0	1	0	0	0	0	0	0	0	0	0	0	0	0	0	0	0	0	0	0	0		3	3	1	0	0	0	0	0	0	1	3595	2	0	0	0	0	0
19		0	2	71	0	1	77	0	0	0	0	1	77	0	0	0	0	0	0	0	0	0	0	0	0	0	0	0	0	0	0		3	3	1	0	0	0	2	0	0	0	0	0	0	0	0	0	0
20		0	1	26	0	1	0	0	0	0	0	1	0	0	0	0	0	0	0	0	0	0	0	0	0	0	0	0	0	0	0		3	0	0	0	0	0	0	0	0	0	0	0	0	0	0	0	0
21		0	1	61	0	1	1513	0	0	0	0	1	751	0	0	0	0	0	0	0	0	0	0	0	0	0	0	0	0	0	0		3	3	0	0	2	2	0	0	0	0	0	0	0	0	0	0	0
22		1	1	54	0	1	0	0	0	0	0	1	0	0	0	0	0	0	0	0	0	0	0	0	0	0	0	0	0	0	0		3	3	0	0	0	2	1	0	0	0	0	0	0	0	0	0	0
24		0	2	62	0	1	0	0	0	0	0	1	68	1	38	0	0	0	0	0	0	0	0	0	0	0	0	0	0	0	0		3	3	0	0	2	2	0	0	0	0	0	0	0	0	0	0	0
23		1	2	71	0	1	2274	0	0	0	0	1	813	1	0	0	0	1	3370	0	0	1	12866	0	0	0	0	0	0	0	0		3	0	0	0	0	2	1	0	0	0	0	0	0	0	0	0	0
25		1	1	73	0	1	77	0	0	0	0	1	107	1	16	0	0	9	0	9	0	9	0	1	77	9	0	9	0	0	0		4	0	0	0	0	2	1	0	2	0	0	0	0	0	0	0	0
26		0	1	69	0	1	17	1	17	0	0	0	0	0	0	0	0	0	0	0	0	0	0	0	0	0	0	0	0	0	0		2	3	0	0	0	2	0	1	1	0	0	0	0	0	0	0	0
27		1	1	61	0	1	91	1	91	0	0	1	91	0	0	0	0	1	91	0	0	0	0	1	0	0	0	0	0	0	0		3	3	9	0	2	2	1	0	2	0	0	0	0	0	0	0	0
28		1	2	73	0	0	0	0	0	0	0	0	0	0	0	0	0	0	0	0	0	0	0	0	0	0	0	0	0	0	0		3	3	0	0	0	2	0	0	1	0	0	0	0	0	0	0	0
29		0	1	63	0	0	0	0	0	0	0	0	0	0	0	0	0	0	0	0	0	0	0	0	0	0	0	0	0	0	0		2	3	0	0	2	2	1	0	2	0	0	0	0	0	0	0	0
30		0	2	61	0	1	417	0	0	0	0	1	417	0	0	0	0	0	0	0	0	0	0	0	0	0	0	0	0	0	0		3	3	1	0	2	2	0	0	0	0	0	0	0	0	0	0	0
31		0	1	59	0	0	0	0	0	0	0	1	0	0	0	0	0	0	0	0	0	0	0	0	0	0	0	0	0	0	0		3	3	1	0	0	0	0	0	0	0	0	0	0	0	0	0	0
32		1	1	74	1	1	1786	0	0	0	0	1	0	1	0	0	0	0	0	0	0	0	0	1	61	0	0	0	0	0	0		3	0	0	0	0	2	1	0	2	0	0	0	0	0	0	0	0
33		0	2	67	0	1	0	1	0	0	0	1	0	0	0	0	0	0	0	0	0	0	0	0	0	0	0	0	0	0	0		2	3	9	0	2	2	1	0	0	1	1692	1	0	1	0	0	0
34		1	1	79	0	1	556	0	0	0	0	0	0	0	0	0	0	0	0	0	0	0	0	0	0	0	0	0	0	0	0		2	3	0	0	0	2	0	0	0	0	0	0	0	0	0	0	0
35		1	1	70	0	0	0	1	0	0	0	1	0	0	0	0	0	0	0	0	0	0	0	0	0	0	0	0	0	0	0		3	3	0	0	2	2	1	0	0	0	0	0	0	0	0	0	0
36		1	2	70	0	1	0	0	0	0	0	1	57	0	0	0	0	0	0	0	0	0	0	0	0	0	0	0	0	0	0		3	0	0	0	0	2	0	0	0	0	0	0	0	0	0	0	0
37		0	1	76	0	1	45	0	0	0	0	1	45	0	0	0	0	0	0	0	0	0	0	0	0	0	0	0	0	0	0		3	3	9	0	2	2	0	0	0	0	0	0	0	0	0	0	0
38		1	1	65	0	1	101	0	0	0	0	1	0	0	0	0	0	0	0	0	0	0	0	1	101	0	0	0	0	0	0		4	0	0	0	0	2	1	1	0	0	0	0	0	0	0	0	0
39		0	1	65	0	1	145	0	0	0	0	1	145	1	0	0	0	0	0	0	0	0	0	0	0	0	0	0	0	0	0		4	3	1	0	2	2	0	0	2	0	0	0	0	0	0	0	0
40		0	1	62	0	1	0	1	0	0	0	1	0	0	0	0	0	0	0	0	0	0	0	0	0	0	0	0	0	0	0		3	3	1	2	2	2	1	0	2	1	1802	1	1	0	0	0	0
41		0	1	51	0	1	115	0	0	0	0	0	0	0	0	0	0	0	0	0	0	0	0	0	0	0	0	0	0	0	0		2	3	9	0	1	2	0	0	9	0	0	0	0	0	0	0	0
42		0	1	69	0	1	0	0	0	0	0	1	0	1	0	1	0	0	0	0	0	0	0	1	0	0	0	0	0	0	0		3	0	0	0	0	0	0	0	0	5	651	1	0	1	1	0	0
43		1	1	48	0	1	0	1	1	0	0	1	1	1	1	0	0	1	1	0	0	0	0	1	1	0	0	0	0	1	1		4	4	1	0	1	2	1	0	1	0	0	0	0	0	0	0	0
44		1	1	33	0	0	0	0	0	0	0	0	0	0	0	0	0	0	0	0	0	0	0	0	0	0	0	0	0	0	0		2	0	1	0	0	0	1	0	1	0	0	0	0	0	0	0	0
45		1	1	61	0	1	0	0	0	0	0	1	0	1	0	0	0	0	0	0	0	0	0	0	0	0	0	0	0	0	0		3	4	0	0	0	2	0	0	0	0	0	0	0	0	0	0	0
46		0	2	71	0	1	0	0	0	0	0	1	0	1	0	0	0	0	0	0	0	0	0	0	0	0	0	0	0	0	0		3	3	0	0	0	2	0	0	0	0	0	0	0	0	0	0	0
47		0	1	79	0	1	960	0	0	0	0	1	595	0	0	0	0	0	0	1	960	0	0	0	0	0	0	0	0	0	0		2	3	0	0	2	2	1	0	0	0	0	0	0	0	0	0	0
48		0	2	68	0	1	852	0	0	0	0	1	0	0	0	0	0	0	0	1	487	0	0	0	0	0	0	0	0	0	0		3	0	1	1	2	2	1	0	2	0	0	0	0	0	0	0	0
49		1	2	49	0	1	25	0	0	0	0	0	0	0	0	0	0	0	0	0	0	0	0	1	25	1	25	0	0	0	0		4	3	0	0	0	0	0	0	0	0	0	0	0	0	0	0	0
50		0	2	62	0	1	0	0	0	0	0	1	0	0	0	0	0	0	0	0	0	0	0	0	0	0	0	0	0	0	0		2	3	0	0	2	2	0	0	2	0	0	0	0	0	0	0	0
51		1	2	52	0	1	45	1	0	0	0	1	0	0	0	0	0	1	3241	1	3971	0	0	0	0	1	3241	0	0	0	0		3	0	1	0	2	0	1	0	0	1	2876	2	1	0	0	0	0
52		1	1	69	0	0	0	0	0	0	0	1	0	0	0	0	0	0	0	0	0	0	0	0	0	0	0	0	0	0	0		2	0	0	0	0	2	0	0	0	0	0	0	0	0	0	0	0
53		0	1	32	0	1	70	0	0	0	0	1	0	0	0	0	0	0	0	0	0	0	0	0	0	0	0	0	0	0	0		3	0	1	0	0	0	0	0	1	0	0	0	0	0	0	0	0
54		1	1	60	0	1	0	0	0	0	0	1	0	0	0	0	0	0	0	0	0	0	0	1	114	0	0	0	0	0	0		2	3	0	0	0	0	2	0	0	0	0	0	0	0	0	0	0
55		1	1	77	0	0	0	1	0	0	0	1	0	0	0	0	0	0	0	0	0	0	0	0	0	0	0	0	0	0	0		3	4	0	3	2	2	1	0	0	1	5493	2	1	0	0	0	0
56		0	1	64	0	1	0	1	0	0	0	0	0	0	0	0	0	0	0	0	0	0	0	0	0	0	0	1	72	0	0		3	3	0	0	2	2	1	0	0	0	0	0	0	0	0	0	0
57		1	2	78	0	1	0	0	0	0	0	1	0	0	0	0	0	0	0	0	0	0	0	0	0	0	0	0	0	0	0		3	3	0	0	2	2	0	0	0	0	0	0	0	0	0	0	0
58		0	1	73	0	1	0	0	0	0	0	1	0	0	0	0	0	1	2709	0	0	0	0	0	0	0	0	0	0	0	0		3	3	0	0	2	2	0	0	0	1	1370	1	1	0	0	0	0
59		0	1	54	0	1	0	0	0	0	0	1	0	0	0	0	0	0	0	0	0	0	0	0	0	0	0	0	0	0	0		3	3	0	0	0	0	0	0	0	0	0	0	0	0	0	0	0
60		1	2	80	1	0	0	0	0	0	0	0	0	0	0	0	0	0	0	0	0	0	0	1	61	0	0	0	0	0	0		3	3	0	0	2	2	1	0	0	0	0	0	0	0	0	0	0
61		1	1	60	0	1	0	0	0	0	0	1	0	0	0	0	0	0	0	0	0	0	0	0	0	0	0	0	0	0	0		3	0	0	0	0	2	0	0	0	0	0	0	0	0	0	0	0
62		0	2	57	0	0	0	0	0	0	0	1	0	0	0	0	0	0	0	0	0	0	0	0	0	0	0	0	0	0	0		3	3	0	0	0	0	0	0	0	0	0	0	0	0	0	0	0
63		1	1	61	0	1	0	1	0	0	0	0	0	0	0	1	0	0	0	0	0	0	0	0	0	0	0	0	0	0	0		3	3	9	2	0	2	1	0	1	0	0	0	0	0	0	0	0
64		0	1	45	0	1	0	0	0	0	0	1	0	0	0	0	0	0	0	0	0	0	0	0	0	0	0	0	0	0	0		3	0	0	2	0	2	1	0	0	0	0	0	0	0	0	0	0
65		0	2	74	0	1	0	1	215	0	0	1	0	0	0	0	0	1	2130	0	0	0	0	0	0	0	0	0	0	0	0		3	3	0	0	2	2	2	0	0	0	0	0	0	0	0	0	0
66		1	2	65	1	1	42	1	42	0	0	1	42	0	0	1	42	1	133	0	0	0	0	1	59	0	0	0	0	0	0		3	5	0	3	2	2	0	0	1	0	0	0	0	0	0	0	0
67		0	2	60	0	0	0	1	139	0	0	1	139	0	0	0	0	0	0	0	0	0	0	0	0	0	0	0	0	0	0		3	3	0	0	2	0	0	0	2	0	0	0	0	0	0	0	0
68		1	1	70	0	1	0	1	0	0	0	1	0	0	0	0	0	0	0	1	118	0	0	1	58	0	0	0	0	0	0		3	0	0	0	0	2	0	0	0	0	0	0	0	0	0	0	0
69		1	1	53	0	0	0	0	0	0	0	0	0	0	0	0	0	0	0	0	0	0	0	0	0	0	0	0	0	0	0		2	0	0	0	0	0	1	0	0	0	0	0	0	0	0	0	0
70		0	1	68	0	1	0	0	0	0	0	1	0	0	0	0	0	1	160	0	0	0	0	1	22	0	0	0	0	0	0		3	0	0	2	2	2	0	0	2	1	113	2	1	0	1	0	0
71		1	1	58	0	0	0	0	0	1	610	0	0	0	0	0	0	0	0	0	0	0	0	0	0	0	0	0	0	0	0		3	0	1	0	2	0	0	0	2	1	1166	1	1	0	0	0	0
72		0	2	56	0	1	0	1	0	0	0	1	0	0	0	0	0	0	0	0	0	0	0	1	35	0	0	0	0	0	0		3	3	0	0	2	2	1	0	0	0	0	0	0	0	0	0	0
73		0	2	65	0	0	0	0	0	0	0	1	1846	0	0	0	0	0	0	0	0	0	0	0	0	0	0	0	0	0	0		2	3	0	3	1	2	1	0	0	0	0	0	0	0	0	0	0
74		0	2	37	0	0	0	0	0	0	0	1	0	0	0	0	0	0	0	0	0	0	0	0	0	0	0	0	0	0	0		3	3	0	0	0	0	0	0	1	0	0	0	0	0	0	0	0
75		1	1	58	0	0	0	0	0	0	0	1	177	0	0	0	0	0	0	0	0	0	0	1	177	0	0	0	0	0	0		2	3	0	0	1	2	0	1	0	0	0	0	0	0	0	0	0
76		1	1	47	0	1	34	0	0	0	0	1	34	0	0	0	0	0	0	0	0	0	0	0	0	0	0	0	0	0	0		4	0	9	0	2	2	0	0	2	0	0	0	0	0	0	0	0
77		0	2	70	0	1	4536	0	0	0	0	1	93	0	0	0	0	0	0	1	3805	0	0	0	0	0	0	0	0	0	0		3	3	0	0	2	0	0	0	0	0	0	0	0	0	0	0	0
78		0	2	54	0	1	0	0	0	0	0	1	0	1	0	0	0	0	0	0	0	0	0	0	0	0	0	0	0	0	0		3	3	0	0	0	2	0	0	0	0	0	0	0	0	0	0	0
79		1	1	48	0	1	960	0	0	0	0	0	0	0	0	0	0	0	0	0	0	0	0	1	0	0	0	0	0	0	0		2	0	1	0	0	0	1	0	2	0	0	0	0	0	0	0	0
80		0	2	60	0	1	185	0	0	0	0	1	0	1	0	1	0	0	0	0	0	0	0	1	12	0	0	0	0	0	0		3	3	1	2	2	2	1	0	2	0	0	0	0	0	0	0	0
81		1	1	47	0	0	0	0	0	0	0	1	0	0	0	0	0	0	0	0	0	0	0	0	0	0	0	0	0	0	0		3	0	0	0	0	0	0	0	0	0	0	0	0	0	0	0	0
82		0	1	73	0	1	2637	0	0	0	0	1	2637	1	0	1	0	0	0	1	323	0	0	0	0	0	0	0	0	0	0		3	0	9	2	2	2	0	1	0	0	0	0	0	0	0	0	0
83		0	1	72	0	1	190	0	0	0	0	1	190	0	0	0	0	0	0	0	0	0	0	1	36	0	0	0	0	0	0		3	3	9	0	0	2	1	0	9	0	0	0	0	0	0	0	0
85		0	1	58	0	1	23	0	0	0	0	0	0	1	23	0	0	0	0	0	0	0	0	1	23	0	0	0	0	0	0		3	3	0	0	0	0	1	0	0	0	0	0	0	0	0	0	0
84		0	2	76	0	0	0	0	0	0	0	1	7	0	0	0	0	0	0	1	0	0	0	0	0	0	0	0	0	0	0		3	0	0	0	2	0	1	0	0	0	0	0	0	0	0	0	0
86		0	1	61	0	1	171	1	171	0	0	1	171	0	0	0	0	0	0	0	0	0	0	0	0	0	0	0	0	0	0		2	4	1	0	0	1	0	0	1	0	0	0	0	0	0	0	0
87		1	1	69	0	1	0	0	0	0	0	0	0	0	0	0	0	0	0	0	0	0	0	0	0	0	0	0	0	1	0		3	0	0	0	2	2	1	0	0	0	0	0	0	0	0	0	0
88		1	1	39	0	0	0	0	0	0	0	0	0	0	0	0	0	0	0	0	0	0	0	0	0	0	0	0	0	0	0		2	0	0	0	0	0	0	0	2	0	0	0	0	0	0	0	0
89		1	1	60	0	1	0	0	0	0	0	0	0	1	151	0	0	0	0	0	0	0	0	0	0	0	0	0	0	0	0		2	3	1	0	2	0	0	0	0	0	0	0	0	0	0	0	0
90		1	1	44	0	1	0	0	0	0	0	1	0	0	0	0	0	0	0	0	0	0	0	0	0	0	0	0	0	0	0		2	3	9	0	0	0	0	0	2	0	0	0	0	0	0	0	0
91		1	1	57	0	0	0	0	0	0	0	0	0	0	0	0	0	0	0	0	0	0	0	0	0	0	0	0	0	0	0		1	2	0	0	0	0	0	0	0	0	0	0	0	0	0	0	0
92		1	2	75	0	0	0	0	0	0	0	1	0	0	0	0	0	1	9528	0	0	0	0	0	0	0	0	0	0	0	0		3	3	0	1	2	2	0	0	0	0	0	0	0	0	0	0	0
93		0	1	62	0	1	0	1	35	0	0	1	25	0	0	0	0	0	0	0	0	0	0	0	0	0	0	0	0	0	0		3	3	1	0	0	2	0	0	2	0	0	0	0	0	0	0	0
94		0	1	48	0	0	0	0	0	0	0	0	0	0	0	0	0	0	0	0	0	0	0	0	0	0	0	0	0	0	0		2	3	0	0	0	2	0	0	0	0	0	0	0	0	0	0	0
95		0	1	68	0	0	0	0	0	0	0	0	0	0	0	0	0	0	0	0	0	0	0	0	0	0	0	0	0	0	0		3	3	0	0	0	2	2	0	0	0	0	0	0	0	0	0	0
96		1	1	74	0	1	0	0	0	0	0	1	0	0	0	0	0	0	0	0	0	0	0	0	0	0	0	0	0	0	0		3	3	0	0	2	0	1	0	0	0	0	0	0	0	0	0	0
97		1	1	77	0	0	0	0	0	0	0	0	0	0	0	0	0	0	0	0	0	0	0	0	0	0	0	0	0	0	0		2	3	0	0	2	2	1	1	0	0	0	0	0	0	0	0	0
98		1	1	62	0	1	0	1	0	0	0	1	0	0	0	1	0	0	0	0	0	0	0	0	0	0	0	0	0	0	0		2	3	0	0	2	2	1	0	0	2	2175	2	0	0	1	0	0
99		1	1	82	0	1	29	1	29	1	29	1	29	1	29	1	29	0	0	0	0	0	0	1	29	0	0	0	0	0	0		3	0	0	1	0	0	0	0	9	0	0	0	0	0	0	0	0
100		0	1	68	0	1	0	0	0	0	0	0	0	1	0	0	0	0	0	0	0	0	0	0	0	0	0	0	0	0	0		3	4	0	0	2	2	1	0	0	3	1849	1	1	0	0	0	0
101		1	1	72	0	1	0	0	0	0	0	1	0	0	0	0	0	0	0	0	0	0	0	0	0	0	0	0	0	0	0		3	3	0	0	0	2	1	0	2	0	0	0	0	0	0	0	0
102		1	2	43	0	1	0	0	0	0	0	1	0	0	0	0	0	0	0	0	0	0	0	0	0	0	0	0	0	0	0		3	3	0	0	0	2	0	0	0	0	0	0	0	0	0	0	0
103		1	2	63	0	0	0	0	0	0	0	0	0	0	0	0	0	0	0	0	0	0	0	0	0	0	0	0	0	0	0		3	3	1	0	2	0	0	0	0	0	0	0	0	0	0	0	0
105		0	1	55	0	1	0	0	0	0	0	1	0	0	0	0	0	0	0	0	0	0	0	0	0	0	0	0	0	0	0		3	3	1	0	0	0	1	1	1	0	0	0	0	0	0	0	0
104		1	1	72	0	0	0	0	0	0	0	1	0	0	0	0	0	0	0	0	0	0	0	0	0	0	0	0	0	0	0		3	3	0	0	0	2	0	0	0	0	0	0	0	0	0	0	0
107		1	1	56	0	1	41	1	41	0	0	1	41	0	0	1	0	0	0	1	3693	0	0	0	0	0	0	0	0	0	0		3	0	0	0	1	2	0	0	2	0	0	0	0	0	0	0	0
106		1	1	60	0	1	0	1	0	0	0	1	0	0	0	1	0	0	0	0	0	0	0	0	0	0	0	0	0	0	0		3	3	0	0	2	2	0	0	0	2	1757	1	0	0	1	0	0
108		0	1	56	0	1	0	0	0	0	0	1	0	0	0	0	0	0	0	0	0	0	0	1	26	0	0	0	0	0	0		3	0	1	0	0	2	1	0	0	0	0	0	0	0	0	0	0
109		0	1	66	0	1	89	0	0	0	0	1	89	0	0	0	0	0	0	0	0	0	0	0	0	0	0	0	0	0	0		3	3	0	0	0	0	1	0	0	0	0	0	0	0	0	0	0
110		0	1	80	0	1	52	0	0	0	0	1	0	0	0	1	47	0	0	0	0	0	0	0	0	0	0	0	0	0	0		2	3	0	0	0	1	0	1	2	0	0	0	0	0	0	0	0
111		1	2	68	1	1	41	1	41	1	41	1	41	1	41	0	0	1	41	0	0	0	0	0	0	0	0	0	0	0	0		2	0	1	0	2	2	1	1	1	0	0	0	0	0	0	0	0
112		0	2	68	0	1	207	1	207	0	0	1	207	1	207	0	0	0	0	0	0	0	0	1	62	0	0	0	0	0	0		4	3	0	4	0	2	0	0	2	0	0	0	0	0	0	0	0
113		0	1	45	0	0	0	0	0	0	0	0	0	0	0	0	0	0	0	0	0	0	0	0	0	0	0	0	0	0	0		1	3	1	0	0	0	0	0	1	0	0	0	0	0	0	0	0
114		1	2	84	0	1	0	0	0	0	0	1	114	0	0	1	54	0	0	0	0	0	0	0	0	0	0	0	0	0	0		3	4	9	0	0	0	0	0	9	0	0	0	0	0	0	0	0
115		0	1	76	0	1	0	0	0	0	0	0	0	0	0	0	0	0	0	0	0	0	0	0	0	0	0	0	0	0	0		2	3	1	0	0	0	0	0	2	0	0	0	0	0	0	0	0
116		1	1	64	0	1	0	0	0	1	0	1	0	1	0	1	0	0	0	0	0	0	0	1	45	0	0	0	0	0	0		2	0	0	0	1	0	0	0	0	0	0	0	0	0	0	0	0
117		0	2	71	0	1	118	0	0	0	0	0	0	0	0	0	0	0	0	0	0	0	0	0	0	0	0	0	0	0	0		2	3	0	0	0	2	0	0	0	0	0	0	0	0	0	0	0
118		0	1	55	0	0	0	1	0	0	0	1	0	0	0	0	0	0	0	0	0	0	0	0	0	0	0	0	0	0	0		3	3	1	0	2	2	0	0	2	0	0	0	0	0	0	0	0
119		0	2	72	0	1	0	0	0	0	0	1	0	0	0	1	4737	0	0	0	0	0	0	0	0	0	0	0	0	0	0		3	0	0	0	2	2	0	0	0	0	0	0	0	0	0	0	0
120		0	1	56	0	1	0	0	0	0	0	1	0	0	0	0	0	0	0	0	0	0	0	0	0	0	0	0	0	1	0		3	4	0	0	0	0	0	0	0	0	0	0	0	0	0	0	0
121		1	1	71	0	0	0	1	0	0	0	1	0	0	0	0	0	0	0	0	0	0	0	0	0	0	0	0	0	0	0		3	3	1	2	2	2	0	0	0	0	0	0	0	0	0	0	0
122		1	1	78	0	0	0	0	0	0	0	0	0	0	0	0	0	0	0	0	0	0	0	0	0	0	0	0	0	0	0		2	3	0	0	2	2	1	0	0	0	0	0	0	0	0	0	0
123		0	2	73	0	1	0	0	0	0	0	0	0	0	0	0	0	0	0	0	0	0	0	0	0	0	0	0	0	0	0		2	0	0	2	0	2	0	0	0	0	0	0	0	0	0	0	0
124		0	1	66	0	1	398	0	0	0	0	1	398	0	0	0	0	0	0	0	0	0	0	0	0	0	0	0	0	0	0		3	3	1	0	2	0	1	0	0	0	0	0	0	0	0	0	0
125		0	2	65	0	0	0	0	0	0	0	1	0	0	0	0	0	0	0	0	0	0	0	0	0	0	0	0	0	0	0		3	3	0	0	0	2	0	0	0	0	0	0	0	0	0	0	0
126		1	2	77	1	1	62	0	0	0	0	1	62	0	0	0	0	0	0	0	0	0	0	1	62	0	0	0	0	1	0		2	3	9	0	0	2	0	0	9	0	0	0	0	0	0	0	0
127		0	1	58	0	1	288	0	0	0	0	1	288	1	1	0	0	0	0	0	0	0	0	1	0	0	0	0	0	0	0		4	4	9	0	0	2	1	0	2	0	0	0	0	0	0	0	0
128		1	1	51	0	1	92	1	92	0	0	1	92	0	0	0	0	0	0	0	0	0	0	0	0	0	0	0	0	0	0		4	3	0	0	0	0	0	0	0	0	0	0	0	0	0	0	0
129		1	2	68	0	1	0	0	0	0	0	0	0	0	0	0	0	0	0	0	0	0	0	0	0	0	0	0	0	0	0		3	3	0	2	2	2	0	0	2	0	0	0	0	0	0	0	0
130		1	1	59	0	0	0	1	73	0	0	1	174	0	0	0	0	0	0	0	0	0	0	0	0	0	0	0	0	0	0		3	3	0	0	0	2	0	0	2	0	0	0	0	0	0	0	0
131		1	1	49	0	1	0	1	0	0	0	1	0	1	0	0	0	0	0	0	0	0	0	0	0	0	0	0	0	0	0		3	0	0	0	2	2	0	0	0	0	0	0	0	0	0	0	0
132		1	1	69	0	0	0	0	0	0	0	1	0	0	0	0	0	0	0	0	0	0	0	0	0	0	0	1	3526	0	0		1	0	0	0	1	2	1	0	2	0	0	0	0	0	0	0	0
133		0	1	71	0	0	0	0	0	0	0	1	369	0	0	0	0	0	0	0	0	0	0	1	109	0	0	0	0	0	0		3	3	0	2	0	0	0	0	0	0	0	0	0	0	0	0	0
134		0	2	61	0	1	0	0	0	0	0	0	0	0	0	0	0	0	0	0	0	0	0	0	0	0	0	0	0	0	0		2	3	0	0	2	2	0	0	2	0	0	0	0	0	0	0	0
135		1	1	54	0	1	0	0	0	0	0	1	0	0	0	0	0	0	0	0	0	0	0	1	132	0	0	0	0	0	0		3	0	0	0	2	2	0	0	1	1	210	1	0	0	1	0	0
136		1	1	69	0	1	3712	0	0	0	0	0	0	0	0	0	0	0	0	0	0	0	0	0	0	0	0	1	246	0	0		2	3	0	0	0	2	0	0	0	0	0	0	0	0	0	0	0
137		0	2	73	0	1	0	0	0	0	0	0	0	0	0	0	0	1	13165	0	0	0	0	0	0	0	0	0	0	0	0		3	3	0	0	2	2	0	0	0	0	0	0	0	0	0	0	0
138		1	1	64	0	1	182	0	0	0	0	1	0	0	0	0	0	0	0	0	0	0	0	0	0	0	0	0	0	0	0		3	0	0	0	0	0	1	0	0	0	0	0	0	0	0	0	0
139		0	1	67	0	1	0	0	0	0	0	0	0	1	0	1	0	0	0	0	0	0	0	1	11	0	0	0	0	0	0		3	3	0	0	0	2	1	0	0	0	0	0	0	0	0	0	0
140		0	1	53	0	1	0	0	0	0	0	1	0	0	0	0	0	0	0	0	0	0	0	0	0	0	0	0	0	0	0		2	3	1	0	0	2	0	0	0	0	0	0	0	0	0	0	0
141		1	1	75	0	1	0	0	0	0	0	0	0	1	0	0	0	0	0	0	0	0	0	1	14	0	0	0	0	0	0		3	3	0	1	2	2	0	0	0	0	0	0	0	0	0	0	0
142		0	1	57	0	1	0	0	0	0	0	1	0	0	0	0	0	0	0	0	0	0	0	1	10	0	0	0	0	0	0		3	3	0	0	0	0	0	0	0	0	0	0	0	0	0	0	0
143		0	1	41	0	1	0	1	0	0	0	1	0	1	51	0	0	0	0	0	0	0	0	0	0	0	0	0	0	0	0		3	3	0	0	2	2	0	0	2	0	0	0	0	0	0	0	0
144		0	1	76	0	1	741	0	0	0	0	1	741	0	0	0	0	0	0	0	0	0	0	0	0	0	0	0	0	0	0		3	3	0	0	0	2	1	1	0	0	0	0	0	0	0	0	0
145		1	1	50	0	1	81	0	0	0	0	1	57	1	57	0	0	1	53	0	0	0	0	0	0	0	0	0	0	1	1		5	4	0	0	1	1	1	0	1	0	0	0	0	0	0	0	0
146		0	1	70	0	1	0	1	0	0	0	1	0	0	0	0	0	0	0	0	0	0	0	0	0	0	0	0	0	0	0		3	3	1	0	2	0	1	0	2	0	0	0	0	0	0	0	0
147		0	2	77	0	0	0	0	0	0	0	1	33	0	0	0	0	0	0	0	0	0	0	0	0	0	0	0	0	0	0		3	2	9	0	2	2	0	0	0	0	0	0	0	0	0	0	0
148		1	1	70	0	1	0	0	0	0	0	1	0	0	0	0	0	0	0	0	0	0	0	1	597	0	0	0	0	0	0		3	0	0	0	2	2	1	0	2	0	0	0	0	0	0	0	0
149		1	1	54	0	0	0	0	0	0	0	0	0	0	0	0	0	0	0	0	0	0	0	0	0	0	0	0	0	0	0		3	3	0	0	0	0	1	0	0	0	0	0	0	0	0	0	0
150		1	1	70	0	1	0	0	0	0	0	0	0	0	0	0	0	0	0	0	0	0	0	0	0	0	0	0	0	0	0		3	4	0	0	2	2	1	0	2	1	715	1	1	0	0	0	0
151		0	2	68	0	1	0	1	0	0	0	1	60	1	60	0	0	0	0	0	0	0	0	0	0	0	0	0	0	0	0		3	3	0	0	2	2	1	0	0	0	0	0	0	0	0	0	0
152		1	2	71	0	1	0	1	0	0	0	0	0	0	0	0	0	0	0	0	0	0	0	0	0	0	0	0	0	0	0		2	3	1	0	2	2	0	0	0	0	0	0	0	0	0	0	0
153		1	1	61	0	1	117	1	117	0	0	1	117	0	0	0	0	1	998	0	0	0	0	0	0	0	0	0	0	0	0		3	0	0	0	2	2	0	0	2	0	0	0	0	0	0	0	0
154		1	1	60	0	1	0	1	29	0	0	0	0	0	0	0	0	0	0	0	0	0	0	0	0	0	0	0	0	0	0		3	3	0	0	0	2	1	0	0	0	0	0	0	0	0	0	0
155		0	1	65	0	1	56	0	0	0	0	1	56	0	0	0	0	0	0	0	0	0	0	0	0	0	0	0	0	0	0		3	3	0	0	0	2	1	0	0	0	0	0	0	0	0	0	0
156		1	1	72	0	1	84	0	0	0	0	1	84	0	0	0	0	1	53	0	0	0	0	0	0	0	0	0	0	0	0		3	0	1	3	2	2	0	0	0	0	0	0	0	0	0	0	0
157		1	1	65	0	0	0	0	0	0	0	1	37	1	0	0	0	0	0	0	0	0	0	0	0	0	0	0	0	0	0		2	3	0	0	0	2	1	0	0	0	0	0	0	0	0	0	0
158		0	1	52	0	1	109	0	0	0	0	1	109	0	0	0	0	0	0	0	0	0	0	1	109	0	0	0	0	0	0		4	4	1	0	2	2	1	0	0	0	0	0	0	0	0	0	0
159		1	1	19	0	1	94	1	94	1	94	1	94	0	0	0	0	0	0	0	0	0	0	0	0	0	0	0	0	0	0		2	3	0	0	0	0	0	0	0	1	1420	2	0	1	0	0	0
160		0	1	46	0	1	0	0	0	0	0	1	0	0	0	0	0	0	0	0	0	0	0	0	0	0	0	0	0	0	0		2	3	0	0	0	0	0	0	0	0	0	0	0	0	0	0	0
161		0	1	30	0	1	14	1	14	0	0	1	14	1	8	0	0	0	0	0	0	0	0	0	0	0	0	0	0	0	0		4	3	0	0	0	0	0	0	0	0	0	0	0	0	0	0	0
162		1	1	82	0	1	0	0	0	0	0	1	0	1	0	0	0	0	0	0	0	0	0	0	0	0	0	0	0	0	0		3	3	0	0	0	2	1	0	0	0	0	0	0	0	0	0	0
163		0	1	74	0	1	0	0	0	0	0	1	0	0	0	0	0	1	6083	0	0	0	0	0	0	0	0	0	0	0	0		3	4	1	3	2	2	0	0	0	1	2480	2	1	0	0	0	0
164		0	2	81	0	1	0	0	0	0	0	1	0	0	0	0	0	0	0	0	0	0	0	0	0	0	0	0	0	0	0		4	4	0	0	2	2	1	1	0	0	0	0	0	0	0	0	0
165		1	1	65	0	1	69	1	69	0	0	1	69	0	0	0	0	0	0	0	0	0	0	0	0	0	0	0	0	0	0		3	0	9	0	2	2	0	0	2	0	0	0	0	0	0	0	0
166		0	2	55	0	1	157	1	157	0	0	1	157	0	0	0	0	0	0	0	0	0	0	0	0	0	0	0	0	0	0		2	3	0	0	0	2	0	0	0	0	0	0	0	0	0	0	0
168		0	1	43	0	1	37	0	0	0	0	1	37	0	0	0	0	0	0	0	0	0	0	0	0	0	0	0	0	0	0		3	3	1	0	0	2	0	0	0	0	0	0	0	0	0	0	0
167		1	1	57	0	1	0	0	0	0	0	0	0	0	0	0	0	0	0	0	0	0	0	0	0	0	0	0	0	0	0		3	0	0	0	2	2	0	0	0	0	0	0	0	0	0	0	0
169		0	1	61	0	0	0	0	0	0	0	0	0	0	0	0	0	0	0	0	0	0	0	0	0	0	0	0	0	0	0		2	3	0	0	0	2	0	1	0	0	0	0	0	0	0	0	0
170		1	1	75	0	1	0	0	0	0	0	1	0	0	0	0	0	1	3257	0	0	0	0	0	0	0	0	0	0	0	0		3	3	1	0	2	2	1	0	0	0	0	0	0	0	0	0	0
171		0	1	44	0	1	389	1	389	0	0	1	389	0	0	0	0	0	0	0	0	0	0	0	0	0	0	0	0	0	0		2	3	1	0	0	2	0	0	1	0	0	0	0	0	0	0	0
172		1	1	68	0	1	0	1	0	0	0	0	0	0	0	0	0	0	0	0	0	0	0	0	0	0	0	0	0	0	0		2	3	9	0	0	2	0	0	0	0	0	0	0	0	0	0	0
174		0	1	60	0	1	0	0	0	0	0	1	0	0	0	0	0	0	0	0	0	0	0	0	0	0	0	0	0	0	0		3	3	0	0	0	0	0	0	0	0	0	0	0	0	0	0	0
173		1	2	63	0	0	0	0	0	0	0	0	0	0	0	0	0	0	0	0	0	0	0	0	0	0	0	0	0	0	0		2	3	1	0	0	2	1	0	2	0	0	0	0	0	0	0	0
175		0	2	79	0	1	0	0	0	0	0	1	0	0	0	0	0	0	0	0	0	0	0	0	0	0	0	0	0	0	0		3	3	0	0	2	2	1	0	0	0	0	0	0	0	0	0	0
176		1	2	60	0	1	0	0	0	0	0	1	6031	0	0	0	0	0	0	0	0	0	0	0	0	0	0	0	0	0	0		4	3	0	0	0	2	0	0	2	0	0	0	0	0	0	0	0
177		1	1	73	0	1	118	0	0	0	0	0	0	0	0	0	0	0	0	0	0	0	0	0	0	0	0	0	0	0	0		3	3	0	0	0	2	0	0	2	0	0	0	0	0	0	0	0
178		1	1	57	0	0	0	1	0	0	0	1	0	1	0	0	0	1	47	0	0	0	0	0	0	0	0	0	0	0	0		3	3	0	0	0	2	0	0	1	0	0	0	0	0	0	0	0
179		1	1	52	0	1	0	1	0	0	0	1	0	0	0	0	0	0	0	0	0	0	0	0	0	0	0	0	0	0	0		3	3	0	0	0	2	0	0	0	0	0	0	0	0	0	0	0
180		1	2	83	0	1	66	1	66	0	0	1	66	0	0	0	0	1	78	0	0	0	0	0	0	0	0	1	81	0	0		3	3	1	0	2	2	1	0	0	0	0	0	0	0	0	0	0
181		1	2	73	0	1	0	1	0	0	0	1	64	0	0	0	0	0	0	0	0	0	0	0	0	0	0	2	35	0	0		2	3	0	0	0	2	0	0	0	0	0	0	0	0	0	0	0
182		0	1	78	0	0	0	0	0	0	0	0	0	0	0	0	0	0	0	0	0	0	0	0	0	0	0	0	0	0	0		2	3	0	0	2	0	1	0	0	0	0	0	0	0	0	0	0
184		0	2	75	0	1	1182	0	0	0	0	1	1182	0	0	0	0	0	0	0	0	0	0	0	0	0	0	0	0	0	0		2	3	0	0	2	0	1	0	0	0	0	0	0	0	0	0	0
183		0	2	80	0	1	0	0	0	0	0	1	0	0	0	0	0	0	0	0	0	0	0	0	0	0	0	0	0	0	0		2	3	0	0	0	2	0	0	0	0	0	0	0	0	0	0	0
185		1	1	74	0	1	0	0	0	0	0	1	75	1	75	0	0	0	0	0	0	0	0	1	9	0	0	4	472	0	0		3	3	0	0	2	2	1	0	0	0	0	0	0	0	0	0	0
186		0	1	68	1	0	0	0	0	0	0	0	3	1	0	0	0	1	1	1	1	0	0	1	0	0	0	0	0	0	0		5	3	0	0	1	1	1	0	0	1	413	1	0	1	0	0	0
187		1	1	59	0	0	0	1	0	0	0	1	0	0	0	0	0	0	0	0	0	0	0	0	0	0	0	0	0	0	0		3	3	0	0	2	0	0	0	1	0	0	0	0	0	0	0	0
188		1	2	59	0	0	0	1	29	0	0	1	29	1	29	0	0	0	0	0	0	0	0	0	0	0	0	0	0	0	0		3	3	0	0	2	2	0	0	2	0	0	0	0	0	0	0	0
189		1	2	77	0	1	27	0	0	0	0	0	0	0	0	0	0	0	0	1	27	0	0	1	27	1	27	0	0	0	0		3	4	0	0	0	0	1	0	0	0	0	0	0	0	0	0	0
190		1	1	66	0	1	0	0	0	0	0	1	0	1	0	1	0	1	170	0	0	0	0	1	45	0	0	0	0	0	0		3	3	0	2	2	2	0	0	0	0	0	0	0	0	0	0	0
191		1	2	58	0	1	1051	0	0	0	0	1	0	0	0	0	0	0	0	0	0	0	0	0	0	0	0	0	0	0	0		2	0	1	0	2	2	0	0	0	0	0	0	0	0	0	0	0
192		1	2	80	0	1	127	1	127	0	0	1	127	0	0	0	0	0	0	0	0	0	0	0	0	0	0	0	0	0	0		3	0	0	0	0	0	1	0	0	0	0	0	0	0	0	0	0
193		1	2	66	0	0	0	0	0	0	0	1	0	0	0	0	0	0	0	0	0	0	0	0	0	0	0	0	0	0	0		3	3	0	0	0	2	0	0	0	0	0	0	0	0	0	0	0
194		1	1	38	0	1	608	0	0	0	0	1	0	0	0	0	0	0	0	0	0	0	0	1	659	0	0	0	0	0	0		3	3	0	0	0	2	0	0	0	0	0	0	0	0	0	0	0
195		0	1	36	0	0	0	0	0	0	0	0	0	0	0	0	0	0	0	0	0	0	0	0	0	0	0	0	0	0	0		1	0	1	0	0	2	1	0	1	0	0	0	0	0	0	0	0
196		1	2	73	0	1	1167	1	436	0	0	1	1167	0	0	0	0	1	2446	0	0	0	0	0	0	0	0	2	711	0	0		4	0	0	0	2	2	1	1	0	0	0	0	0	0	0	0	0
197		0	1	68	0	0	0	1	34	0	0	0	0	0	0	0	0	0	0	0	2042	0	0	0	0	0	0	0	0	0	0		2	3	1	0	2	2	1	0	2	0	0	0	0	0	0	0	0
198		1	1	79	0	1	0	0	0	0	0	1	0	0	0	0	0	0	0	0	0	0	0	1	19	0	0	0	0	0	0		4	3	1	0	2	2	1	0	0	0	0	0	0	0	0	0	0
199		0	2	68	0	1	0	0	0	0	0	1	0	0	0	1	0	0	0	0	0	0	0	1	0	0	0	0	0	0	0		3	0	1	0	0	2	1	0	0	0	0	0	0	0	0	0	0
200		1	2	58	0	1	0	0	0	0	0	1	111	1	111	1	0	1	685	0	0	0	0	1	111	0	0	0	0	0	0		4	0	0	3	2	2	1	0	2	1	1084	2	0	1	0	0	0
201		0	1	58	0	1	96	0	0	0	0	0	0	0	0	0	0	0	0	0	0	0	0	0	0	0	0	0	0	0	0		3	3	1	0	0	2	0	0	0	0	0	0	0	0	0	0	0
202		0	1	59	0	1	0	0	0	0	0	1	0	1	0	0	0	0	0	1	7	0	0	1	10	0	0	0	0	0	0		3	3	1	2	2	2	1	0	2	0	0	0	0	0	0	0	0
203		0	2	75	0	1	97	0	0	0	0	1	97	1	97	0	0	0	0	1	0	0	0	1	828	0	0	0	0	0	0		3	3	0	0	1	1	1	0	2	0	0	0	0	0	0	0	0
204		0	2	33	0	1	0	0	0	0	0	0	0	0	0	0	0	0	0	0	0	0	0	0	0	0	0	0	0	0	0		3	2	1	0	0	2	0	0	0	0	0	0	0	0	0	0	0
205		0	1	55	0	1	0	0	0	0	0	1	0	1	0	0	0	0	0	0	0	0	0	0	0	0	0	0	0	0	0		3	3	0	0	0	2	1	0	0	0	0	0	0	0	0	0	0
206		0	2	56	0	0	0	0	0	0	0	0	0	0	0	0	0	0	0	0	0	0	0	0	0	0	0	0	0	0	0		3	3	0	0	0	0	1	0	1	0	0	0	0	0	0	0	0
207		0	2	67	0	0	0	1	0	0	0	1	123	0	0	0	0	0	0	0	0	0	0	0	0	0	0	0	0	0	0		3	3	0	0	0	2	0	0	0	0	0	0	0	0	0	0	0
208		1	1	54	0	1	0	0	0	0	0	1	0	0	0	0	0	0	0	0	0	0	0	0	0	0	0	0	0	0	0		3	3	0	0	0	2	0	0	0	0	0	0	0	0	0	0	0
209		1	1	34	0	0	0	0	0	0	0	0	0	0	0	0	0	0	0	0	0	0	0	0	0	0	0	0	0	0	0		1	3	0	0	0	0	0	0	0	0	0	0	0	0	0	0	0
210		0	1	62	0	1	0	0	0	0	0	1	0	0	0	1	96	0	0	0	0	0	0	1	96	0	0	0	0	0	0		2	3	0	0	0	2	0	0	0	0	0	0	0	0	0	0	0
211		1	1	70	0	1	0	1	0	0	0	1	0	0	0	0	0	0	0	0	0	0	0	0	0	0	0	0	0	0	0		3	0	0	0	0	0	1	0	0	0	0	0	0	0	0	0	0
212		1	2	67	0	0	0	0	0	0	0	0	0	0	0	0	0	1	0	1	66	0	0	1	66	0	0	0	0	0	0		2	0	0	0	0	2	0	0	0	0	0	0	0	0	0	0	0
213		0	1	67	0	1	570	0	0	0	0	1	570	0	0	1	23	0	0	0	0	0	0	1	23	0	0	0	0	0	0		3	3	9	0	0	2	1	0	0	0	0	0	0	0	0	0	0
214		1	1	61	0	1	0	0	0	0	0	1	0	0	0	0	0	0	0	0	0	0	0	0	0	0	0	0	0	0	0		3	0	0	0	2	2	1	0	1	1	1868	1	0	0	0	0	0
215		0	1	56	0	0	0	0	0	0	0	0	0	0	0	0	0	0	0	0	0	0	0	1	17	0	0	0	0	0	0		3	3	0	0	0	0	0	0	1	0	0	0	0	0	0	0	0
216		1	1	65	0	1	0	0	0	0	0	1	0	1	0	0	0	0	0	0	0	0	0	1	38	0	0	0	0	0	0		3	3	0	0	0	2	0	0	0	0	0	0	0	0	0	0	0
217		0	2	64	0	1	181	0	0	0	0	1	181	0	0	0	0	0	0	0	0	0	0	0	0	0	0	0	0	0	0		3	3	0	0	1	2	0	0	0	0	0	0	0	0	0	0	0
220		0	1	58	0	1	0	1	0	0	0	1	0	0	0	0	0	0	0	0	0	0	0	1	19	0	0	0	0	0	0		3	0	0	0	0	2	1	0	0	0	0	0	0	0	0	0	0
219		0	1	70	0	1	2069	1	2069	0	0	1	2069	0	0	1	2069	1	1947	0	0	0	0	0	0	0	0	0	0	0	0		3	3	1	2	2	2	1	0	0	1	1840	1	1	0	0	0	0
218		1	2	74	0	0	0	1	0	0	0	0	0	0	0	0	0	0	0	0	0	0	0	0	0	0	0	0	0	0	4		3	3	0	0	2	2	1	0	0	0	0	0	0	0	0	0	0
221		0	1	36	0	1	44	0	0	0	0	1	0	0	0	0	0	0	0	0	0	0	0	0	0	0	0	0	0	0	0		2	3	0	0	0	0	0	0	0	0	0	0	0	0	0	0	0
222		1	1	72	0	1	0	0	0	0	0	1	0	0	0	0	0	0	0	0	0	0	0	0	0	0	0	0	0	0	0		3	3	0	0	0	2	1	0	1	0	0	0	0	0	0	0	0
223		1	1	55	0	0	0	0	0	0	0	1	0	1	0	0	0	0	0	0	0	0	0	0	0	0	0	0	0	0	0		3	3	0	0	2	2	1	0	1	0	0	0	0	0	0	0	0
224		0	1	40	0	0	0	0	0	0	0	0	0	0	0	0	0	0	0	0	0	0	0	0	0	0	0	0	0	0	0		2	3	0	0	0	2	0	0	2	0	0	0	0	0	0	0	0
225		1	1	58	0	1	743	1	743	0	0	1	743	1	378	1	1839	0	0	1	17	0	0	0	0	0	0	0	0	0	0		3	3	1	0	0	2	0	0	0	0	0	0	0	0	0	0	0
226		0	1	69	0	1	36	1	0	0	0	1	36	0	0	0	0	0	0	1	5788	0	0	0	0	0	0	0	0	0	0		2	3	0	0	0	0	0	0	0	0	0	0	0	0	0	0	0
227		0	1	24	0	1	0	1	0	0	0	1	0	0	0	0	0	0	0	0	0	0	0	0	0	0	0	0	0	0	0		2	2	0	0	0	2	0	0	0	0	0	0	0	0	0	0	0
228		1	1	36	0	1	67	0	0	0	0	1	67	1	67	0	0	0	0	0	0	0	0	1	67	0	0	0	0	0	1		2	0	0	0	0	0	0	1	2	0	0	0	0	0	0	0	0
230		0	1	79	0	1	0	1	0	0	0	1	0	0	0	0	0	0	0	0	0	0	0	0	0	0	0	0	0	0	0		2	4	0	0	2	2	1	0	0	1	3179	2	1	0	0	0	0
229		0	1	81	0	1	59	0	0	0	0	1	59	0	0	0	0	0	0	0	0	0	0	0	0	0	0	0	0	0	0		3	3	0	0	0	0	1	0	2	0	0	0	0	0	0	0	0
231		0	1	78	0	1	340	0	0	0	0	1	340	1	340	1	187	0	0	0	0	0	0	0	0	0	0	0	0	0	0		4	3	1	2	2	2	0	0	2	0	0	0	0	0	0	0	0
232		0	1	81	0	1	231	1	111	1	111	0	0	0	0	1	7386	1	37	0	0	0	0	0	0	0	0	0	0	0	0		4	0	0	0	2	2	1	0	2	0	0	0	0	0	0	0	0
233		0	2	73	0	0	0	0	0	0	0	1	0	0	0	0	0	0	0	0	0	0	0	0	0	0	0	0	0	0	0		2	3	0	0	2	2	0	0	0	0	0	0	0	0	0	0	0
234		0	1	49	0	0	0	0	0	0	0	0	0	0	0	0	0	0	0	0	0	0	0	0	0	0	0	0	0	0	0		3	3	0	0	0	0	0	0	0	0	0	0	0	0	0	0	0
235		1	2	66	0	1	0	0	0	0	0	0	0	0	0	0	0	0	0	0	0	0	0	1	0	0	0	0	0	0	1		4	5	1	2	2	2	0	0	0	0	0	0	0	0	0	0	0
236		0	1	66	0	0	0	0	0	0	0	1	15	0	0	0	0	0	0	0	0	0	0	0	0	0	0	0	0	0	0		3	3	0	0	2	2	1	0	0	0	0	0	0	0	0	0	0
237		1	2	34	0	1	0	0	0	0	0	0	0	0	0	0	0	0	0	0	0	0	0	1	3	0	0	0	0	0	0		3	0	0	0	9	2	9	9	1	0	0	0	0	0	0	0	0
238		1	1	64	0	1	0	0	0	0	0	1	0	1	0	0	0	0	0	1	3654	0	0	0	0	0	0	0	0	0	0		3	0	0	0	1	2	1	0	0	1	308	1	0	1	1	0	0
240		0	1	68	0	1	0	0	0	0	0	1	0	0	0	0	0	0	0	0	0	0	0	0	0	0	0	0	0	0	0		3	3	0	0	0	0	0	0	0	0	0	0	0	0	0	0	0
239		1	1	71	0	0	0	0	0	0	0	1	218	0	0	0	0	0	0	0	0	0	0	0	0	0	0	0	0	0	0		3	3	0	0	1	2	1	0	0	0	0	0	0	0	0	0	0
241		0	1	68	0	1	94	0	0	0	0	1	0	1	0	1	0	0	0	0	0	0	0	1	10	0	0	0	0	0	0		4	3	0	2	2	2	0	0	2	0	0	0	0	0	0	0	0
242		1	1	74	0	1	0	1	0	0	0	1	0	0	0	0	0	0	0	0	0	0	0	0	0	0	0	0	0	0	0		3	3	0	0	0	2	0	0	0	0	0	0	0	0	0	0	0
243		1	2	57	0	0	0	0	0	0	0	0	0	0	0	0	0	0	0	0	0	0	0	0	0	0	0	0	0	0	0		3	3	0	0	0	2	1	0	2	0	0	0	0	0	0	0	0
244		1	1	52	0	1	0	0	0	0	0	0	0	0	0	0	0	0	0	0	0	0	0	0	0	0	0	0	0	0	0		3	4	9	0	0	2	0	0	9	0	0	0	0	0	0	0	0
245		0	1	51	0	0	0	0	0	0	0	0	0	0	0	0	0	0	0	0	0	0	0	0	0	0	0	0	0	0	0		1	0	0	0	2	2	0	0	2	0	0	0	0	0	0	0	0
247		1	1	49	0	1	20	0	0	0	0	1	20	1	0	1	20	0	0	0	0	0	0	1	20	0	0	0	0	1	0		3	4	0	0	0	1	1	0	0	0	0	0	0	0	0	0	0
246		1	2	52	0	1	0	0	0	0	0	1	0	0	0	0	0	0	0	0	0	0	0	1	648	0	0	0	0	0	0		3	3	0	0	0	0	1	0	0	0	0	0	0	0	0	0	0
248		1	1	60	0	1	114	0	0	0	0	1	114	1	114	0	0	0	0	0	0	0	0	1	23	0	0	1	114	0	0		3	0	0	0	0	0	1	1	2	0	0	0	0	0	0	0	0
249		1	1	44	0	0	0	0	0	0	0	1	68	0	0	1	19	0	0	0	0	0	0	0	0	0	0	0	0	0	0		3	3	0	0	0	0	1	0	0	0	0	0	0	0	0	0	0
250		1	2	70	0	1	41	0	0	0	0	1	41	0	0	0	0	0	0	0	0	0	0	1	41	0	0	0	0	0	0		3	3	0	0	2	2	0	0	0	0	0	0	0	0	0	0	0
251		0	1	45	0	1	0	1	0	0	0	1	20	0	0	0	0	1	51	0	0	0	0	0	0	0	0	0	0	0	0		3	3	9	3	2	2	1	0	1	0	0	0	0	0	0	0	0
252		0	2	79	0	1	0	0	0	0	0	0	0	0	0	0	0	0	0	0	0	0	0	1	35	0	0	0	0	0	0		3	3	0	2	0	2	0	0	2	0	0	0	0	0	0	0	0
253		1	1	57	0	1	200	0	0	0	0	1	200	0	0	0	0	0	0	0	0	0	0	0	0	0	0	0	0	0	0		2	4	0	0	0	2	0	0	0	0	0	0	0	0	0	0	0
254		1	1	65	0	1	0	0	0	0	0	1	95	0	0	0	0	0	0	0	0	0	0	0	0	0	0	0	0	0	0		3	3	0	0	0	2	1	0	0	0	0	0	0	0	0	0	0
255		1	1	69	0	1	0	0	0	0	0	1	0	0	0	0	0	0	0	0	0	0	0	0	0	0	0	0	0	0	0		3	3	0	0	2	2	0	0	1	0	0	0	0	0	0	0	0
256		1	2	31	0	0	0	0	0	0	0	1	0	0	0	0	0	0	0	0	0	0	0	0	0	0	0	1	0	0	0		2	0	0	0	0	0	0	0	0	1	2912	1	0	0	0	0	0
257		0	1	58	0	1	0	0	0	0	0	1	0	0	0	0	0	0	0	0	0	0	0	0	0	0	0	0	0	0	0		3	3	0	0	2	2	0	0	2	0	0	0	0	0	0	0	0
258		0	2	51	0	1	0	1	0	0	0	0	0	0	0	0	0	0	0	0	0	0	0	0	0	0	0	0	0	0	0		2	3	1	0	0	0	0	0	2	0	0	0	0	0	0	0	0
259		0	2	45	0	1	28	0	0	0	0	0	0	0	0	0	0	0	0	0	0	0	0	0	0	0	0	0	0	0	0		2	3	0	0	0	0	0	0	0	0	0	0	0	0	0	0	0
260		1	1	61	0	1	0	0	0	0	0	1	2	0	0	0	0	0	0	0	0	1	57	0	0	0	0	3	81	0	0		3	3	0	0	2	2	0	0	1	0	0	0	0	0	0	0	0
261		0	1	65	0	1	48	0	0	0	0	1	48	0	0	0	0	0	0	0	0	0	0	0	0	0	0	0	0	0	0		2	3	0	0	0	2	1	0	0	0	0	0	0	0	0	0	0
262		1	1	80	0	1	0	0	0	0	0	1	0	0	0	0	0	1	9	0	0	0	0	1	9	0	0	0	0	0	0		3	3	0	0	0	0	0	0	0	0	0	0	0	0	0	0	0
263		0	2	42	0	0	0	0	0	1	33	0	0	0	0	0	0	1	33	0	0	0	0	0	0	0	0	0	0	0	0		3	3	1	0	0	2	0	0	0	0	0	0	0	0	0	0	0
264		1	1	83	0	0	0	0	0	0	0	1	0	0	0	0	0	0	0	0	0	0	0	0	0	0	0	0	0	0	0		3	4	1	2	2	2	1	1	0	0	0	0	0	0	0	0	0
265		1	1	60	0	1	34	0	0	0	0	0	0	0	0	0	0	0	0	0	0	0	0	0	0	0	0	0	0	0	0		3	0	0	0	2	2	0	0	0	0	0	0	0	0	0	0	0
266		0	1	63	0	1	187	0	0	0	0	1	187	0	0	1	0	1	1711	0	0	0	0	0	0	0	0	0	0	0	0		1	4	1	0	2	2	1	1	2	2	650	1	1	0	0	0	0
267		0	2	66	0	1	6	1	32	1	32	1	32	0	0	0	0	1	1520	1	1154	1	4807	0	0	0	0	0	0	0	0		3	3	0	0	2	2	1	0	1	0	0	0	0	0	0	0	0
268		1	2	41	0	1	62	0	0	0	0	1	0	0	0	0	0	0	0	0	0	0	0	1	62	0	0	0	0	0	0		3	0	0	0	0	0	0	0	0	2	4294	1	0	0	1	0	0
269		0	1	40	0	0	0	0	0	0	0	0	0	0	0	0	0	0	0	0	0	0	0	0	0	0	0	0	0	0	0		3	3	0	0	0	0	0	0	0	0	0	0	0	0	0	0	0
270		0	2	69	0	0	0	0	0	0	0	0	0	0	0	0	0	0	0	0	0	0	0	0	0	0	0	0	0	0	0		2	3	0	0	0	2	1	0	0	0	0	0	0	0	0	0	0
271		0	1	44	0	1	186	0	0	0	0	0	0	0	0	0	0	0	0	0	0	0	0	0	0	0	0	0	0	0	0		2	3	9	0	2	2	0	0	2	0	0	0	0	0	0	0	0
272		1	2	68	0	1	0	0	0	0	0	1	0	0	0	0	0	0	0	0	0	0	0	0	0	0	0	0	0	0	0		2	0	1	0	2	2	0	0	0	0	0	0	0	0	0	0	0
273		0	1	66	0	1	0	1	0	0	0	1	0	0	0	0	0	0	0	0	0	0	0	0	0	0	0	0	0	0	0		3	3	0	0	2	2	1	0	0	0	0	0	0	0	0	0	0
274		0	1	64	0	1	0	1	0	0	0	0	0	0	0	1	0	1	628	0	0	0	0	0	0	0	0	0	0	0	0		3	3	1	1	2	2	1	0	1	0	0	0	0	0	0	0	0
275		0	2	49	0	1	385	1	111	0	0	1	111	0	0	0	0	0	0	0	0	0	0	0	0	0	0	0	0	0	0		2	3	0	0	0	0	1	0	2	0	0	0	0	0	0	0	0
276		0	1	71	0	1	2297	0	0	0	0	1	0	0	0	0	0	0	0	0	0	0	0	0	0	0	0	0	0	0	0		3	0	0	0	2	2	0	0	0	0	0	0	0	0	0	0	0
277		1	1	51	0	1	58	1	58	0	0	1	58	0	0	0	0	0	0	0	0	0	0	1	58	0	0	0	0	0	0		3	0	0	0	0	2	0	0	0	0	0	0	0	0	0	0	0
278		1	1	61	0	1	2346	0	0	0	0	1	885	0	0	0	0	0	0	0	0	0	0	0	0	0	0	0	0	0	0		2	0	0	0	0	0	0	0	0	0	0	0	0	0	0	0	0
279		0	2	80	0	1	0	0	0	0	0	1	0	0	0	0	0	0	0	0	0	0	0	0	0	0	0	0	0	0	0		3	0	0	0	0	2	0	0	0	0	0	0	0	0	0	0	0
280		0	2	81	0	1	0	0	0	0	0	1	0	0	0	0	0	0	0	0	0	0	0	1	21	0	0	0	0	0	0		2	3	0	0	0	2	0	0	0	0	0	0	0	0	0	0	0
281		1	1	45	0	1	0	1	0	0	0	0	0	0	0	0	0	0	0	0	0	0	0	0	0	0	0	0	0	0	0		2	3	0	0	0	0	0	0	0	0	0	0	0	0	0	0	0
282		1	1	68	0	1	753	0	0	0	0	1	53	0	0	0	0	0	0	0	0	0	0	0	0	0	0	0	0	0	0		3	3	0	0	2	2	0	0	0	0	0	0	0	0	0	0	0
283		0	2	56	0	1	0	1	0	0	0	1	0	0	0	0	0	0	0	0	0	0	0	0	0	0	0	0	0	0	0		3	4	0	2	2	2	1	0	0	1	1339	2	0	0	1	0	0
284		0	2	70	0	0	0	1	28	0	0	1	28	1	28	0	0	0	0	0	0	0	0	0	0	0	0	0	0	0	0		3	3	9	0	2	2	0	0	0	0	0	0	0	0	0	0	0
285		0	1	62	0	1	0	1	41	1	377	0	0	0	0	0	0	0	0	0	0	0	0	0	0	0	0	0	0	0	0		3	4	1	0	0	2	1	1	0	0	0	0	0	0	0	0	0
286		1	2	77	0	1	202	0	0	0	0	1	202	1	202	1	0	0	0	0	0	0	0	0	0	0	0	0	0	0	0		4	0	0	1	0	0	0	9	0	0	0	0	0	0	0	0	0
287		0	2	46	0	1	30	0	0	0	0	1	30	1	30	0	0	0	0	0	0	0	0	1	121	0	0	0	0	0	0		3	5	1	0	0	0	0	0	0	0	0	0	0	0	0	0	0
288		0	1	82	0	1	0	0	0	0	0	1	0	0	0	0	0	0	0	0	0	0	0	0	0	0	0	0	0	0	0		3	4	0	3	2	2	1	0	0	0	0	0	0	0	0	0	0
289		1	1	75	0	1	0	0	0	0	0	1	0	1	0	0	0	0	0	0	0	0	0	0	0	0	0	0	0	0	0		3	3	0	0	0	0	1	0	0	0	0	0	0	0	0	0	0
290		0	1	68	0	0	0	0	0	0	0	0	0	0	0	0	0	0	0	0	0	0	0	0	0	0	0	0	0	0	0		3	3	0	0	0	0	0	0	0	0	0	0	0	0	0	0	0
291		1	1	74	0	1	0	0	0	0	0	0	0	0	0	0	0	0	0	0	0	0	0	0	0	0	0	4	16	0	0		3	3	0	0	2	2	0	0	0	0	0	0	0	0	0	0	0
292		0	1	70	0	1	108	1	108	0	0	1	108	0	0	0	0	1	107	0	0	0	0	1	67	0	0	0	0	0	0		3	4	0	2	2	2	1	0	0	0	0	0	0	0	0	0	0
293		1	1	55	0	0	0	1	79	1	29	1	79	1	43	0	0	0	0	0	0	0	0	0	0	0	0	0	0	0	0		4	3	0	0	2	2	1	0	2	0	0	0	0	0	0	0	0
294		0	1	50	0	1	0	0	0	0	0	1	0	0	0	0	0	0	0	0	0	0	0	0	0	0	0	0	0	0	0		2	3	0	0	0	0	0	0	0	0	0	0	0	0	0	0	0
295		0	2	81	0	0	0	0	0	0	0	0	0	0	0	0	0	0	0	0	0	0	0	0	0	0	0	0	0	0	0		3	3	0	0	2	2	1	0	0	0	0	0	0	0	0	0	0
296		0	1	46	0	0	0	1	131	0	0	0	0	0	0	0	0	0	0	0	0	0	0	0	0	0	0	0	0	0	0		3	3	0	0	0	2	0	0	0	0	0	0	0	0	0	0	0
297		1	1	48	0	0	0	0	0	0	0	0	0	0	0	0	0	0	0	0	0	0	0	0	0	0	0	0	0	0	0		1	3	1	0	0	0	1	0	0	0	0	0	0	0	0	0	0
298		0	2	75	0	1	29	0	0	0	0	1	0	1	0	1	0	0	0	0	0	0	0	1	29	0	0	0	0	0	0		4	3	0	0	2	2	1	1	0	0	0	0	0	0	0	0	0
299		0	2	45	0	1	0	0	0	0	0	0	0	0	0	1	384	0	0	0	0	0	0	1	308	0	0	0	0	0	0		3	4	0	0	2	2	1	0	0	0	0	0	0	0	0	0	0
300		1	2	76	0	1	173	0	0	0	0	0	0	1	0	0	0	0	0	0	0	0	0	1	51	1	51	0	0	0	0		3	4	0	0	0	2	0	0	1	0	0	0	0	0	0	0	0
301		1	1	42	0	1	7	0	0	0	0	1	0	0	0	0	0	0	0	0	0	0	0	0	0	0	0	0	0	0	0		3	0	1	0	0	2	0	0	0	1	2133	1	0	1	0	0	0
302		1	2	80	0	1	0	0	0	0	0	1	0	0	0	1	44	0	0	0	0	0	0	0	0	0	0	0	0	0	0		3	3	0	0	2	2	1	0	2	1	2416	1	0	0	1	1	0
303		1	1	35	0	0	0	0	0	0	0	1	0	0	0	0	0	0	0	0	0	0	0	0	0	0	0	0	0	0	0		2	2	0	0	0	0	0	0	0	0	0	0	0	0	0	0	0
304		0	1	64	0	1	60	1	0	1	10	0	0	0	0	0	0	1	60	0	0	0	0	1	60	0	0	0	0	0	0		4	3	0	3	2	2	0	0	2	1	59	1	1	0	1	0	0
305		0	1	54	0	1	665	1	665	0	0	1	0	0	0	0	0	0	0	0	0	0	0	0	0	0	0	0	0	0	0		2	0	0	0	2	2	0	0	0	0	0	0	0	0	0	0	0
306		1	2	60	0	1	0	0	0	0	0	1	2054	1	228	1	1324	0	0	0	0	1	0	1	105	0	0	0	0	0	0		4	0	9	0	2	2	1	9	0	0	0	0	0	0	0	0	0
307		0	1	62	0	1	0	0	0	0	0	0	0	1	0	0	0	0	0	0	0	0	0	0	0	0	0	0	0	0	0		3	3	1	1	0	2	1	0	1	0	0	0	0	0	0	0	0
308		0	1	57	0	1	0	0	0	0	0	1	0	0	0	0	0	0	0	1	18	0	0	0	0	0	0	0	0	0	0		3	3	0	0	0	2	0	0	0	0	0	0	0	0	0	0	0
309		0	1	74	0	1	-16	0	0	0	0	1	0	0	0	1	0	0	0	0	0	0	0	0	0	0	0	0	0	0	0		3	3	0	0	2	2	1	1	2	0	0	0	0	0	0	0	0
310		1	1	33	0	1	0	0	0	0	0	1	0	1	0	0	0	0	0	0	0	0	0	0	0	0	0	0	0	0	0		4	0	0	0	0	0	0	0	0	0	0	0	0	0	0	0	0
311		1	2	35	0	1	390	0	0	0	0	1	390	0	0	0	0	0	0	1	390	0	0	0	0	0	0	0	0	0	0		3	0	0	0	0	2	0	0	0	0	0	0	0	0	0	0	0
312		0	1	59	0	1	0	0	0	1	0	0	0	1	0	0	0	0	0	0	0	0	0	0	0	0	0	0	0	0	0		3	3	0	0	0	2	0	1	1	0	0	0	0	0	0	0	0
313		1	1	57	1	1	0	0	0	0	0	0	0	1	0	0	0	0	0	0	0	0	0	1	0	0	0	0	0	1	0		4	0	0	0	0	0	1	0	0	0	0	0	0	0	0	0	0
315		0	1	58	0	1	0	0	0	0	0	1	115	0	0	0	0	0	0	0	0	0	0	1	19	0	0	0	0	0	0		3	3	0	2	2	2	0	0	0	0	0	0	0	0	0	0	0
316		0	1	61	0	1	0	0	0	0	0	0	0	0	0	0	0	0	0	0	0	0	0	0	0	0	0	0	0	0	0		2	0	0	0	0	2	0	0	0	0	0	0	0	0	0	0	0
314		0	1	78	0	1	0	1	0	0	0	0	0	0	0	1	0	0	0	0	0	0	0	1	44	0	0	0	0	0	0		3	3	1	3	2	2	1	0	0	0	0	0	0	0	0	0	0
317		1	1	53	0	1	374	0	0	0	0	1	0	0	0	0	0	0	0	0	0	0	0	0	0	0	0	0	0	0	0		3	3	1	0	0	2	0	0	0	0	0	0	0	0	0	0	0
318		0	1	50	0	1	0	0	0	0	0	0	0	0	0	0	0	0	0	0	0	0	0	0	0	0	0	0	0	0	0		3	3	0	0	0	2	0	0	0	0	0	0	0	0	0	0	0
319		0	1	47	0	1	297	0	0	0	0	1	0	0	0	1	7	0	0	0	0	0	0	1	7	0	0	0	0	0	0		3	0	0	0	0	0	1	0	0	0	0	0	0	0	0	0	0
320		0	1	67	0	1	0	0	0	0	0	1	0	0	0	1	0	0	0	0	0	0	0	0	0	0	0	0	0	0	0		3	3	0	0	2	2	1	1	0	0	0	0	0	0	0	0	0
321		1	1	67	0	0	0	0	0	0	0	1	0	0	0	0	0	0	0	0	0	0	0	1	105	0	0	0	0	0	0		3	3	0	0	2	2	0	0	1	0	0	0	0	0	0	0	0
322		1	1	54	0	0	0	0	0	0	0	1	0	0	0	0	0	0	0	0	0	0	0	0	0	0	0	0	0	0	0		3	3	0	0	0	0	0	0	0	0	0	0	0	0	0	0	0
323		0	1	53	0	1	0	0	0	0	0	0	0	0	0	0	0	0	0	0	0	0	0	0	0	0	0	0	0	0	0		3	3	0	0	0	0	0	0	0	0	0	0	0	0	0	0	0
324		0	1	69	0	0	0	0	0	1	16	0	0	0	0	0	0	1	16	0	0	0	0	0	0	0	0	0	0	0	0		4	3	0	0	0	2	0	0	2	0	0	0	0	0	0	0	0
325		1	1	64	0	1	1771	0	0	0	0	1	1771	0	0	0	0	0	0	0	0	0	0	0	0	0	0	0	0	0	0		3	0	0	0	0	0	1	0	2	1	1618	2	0	0	1	0	0
326		1	1	63	0	1	0	0	0	0	0	1	0	1	0	0	0	0	0	0	0	0	0	0	0	0	0	0	0	0	0		2	3	0	0	0	2	1	0	0	0	0	0	0	0	0	0	0
327		0	1	47	0	0	0	0	0	0	0	1	0	0	0	0	0	0	0	0	0	0	0	1	1	0	0	0	0	0	0		3	4	0	2	2	2	1	0	0	0	0	0	0	0	0	0	0
330		0	1	50	0	1	0	0	0	0	0	0	0	0	0	0	0	0	0	0	0	0	0	0	0	0	0	0	0	0	0		2	3	0	0	0	0	1	0	0	0	0	0	0	0	0	0	0
329		0	1	58	0	0	0	0	0	0	0	1	0	0	0	0	0	0	0	0	0	0	0	0	0	0	0	0	0	0	0		3	3	0	0	2	2	1	0	2	0	0	0	0	0	0	0	0
328		1	1	76	0	1	0	0	0	0	0	1	0	0	0	0	0	0	0	0	0	0	0	1	14	0	0	0	0	0	0		3	3	0	0	2	2	2	0	0	0	0	0	0	0	0	0	0
331		0	1	60	0	1	0	0	0	0	0	0	0	0	0	0	0	0	0	0	0	0	0	0	0	0	0	0	0	0	0		3	0	0	0	0	1	0	0	0	0	0	0	0	0	0	0	0
333		1	2	39	0	1	0	0	0	0	0	1	0	0	0	0	0	0	0	0	0	0	0	1	24	0	0	0	0	0	0		3	3	0	0	0	0	0	0	2	1	7989	2	0	0	0	0	0
332		1	1	71	0	0	0	0	0	0	0	1	0	0	0	0	0	0	0	0	0	0	0	0	0	0	0	0	0	0	0		3	3	0	0	0	2	1	0	0	0	0	0	0	0	0	0	0
334		0	1	55	0	1	738	0	0	0	0	1	0	0	0	1	738	0	0	0	0	0	0	0	0	0	0	0	0	0	0		2	3	0	0	2	2	0	0	0	0	0	0	0	0	0	0	0
335		0	1	75	0	1	0	0	0	0	0	1	0	0	0	0	0	0	0	0	0	0	0	0	0	0	0	0	0	0	0		2	3	0	0	2	2	1	0	2	0	0	0	0	0	0	0	0
336		0	1	40	0	1	0	0	0	0	0	0	0	0	0	0	0	0	0	0	0	0	0	0	0	0	0	0	0	0	0		2	3	0	0	0	0	0	0	2	0	0	0	0	0	0	0	0
337		0	1	50	0	1	0	1	0	0	0	1	0	0	0	0	0	0	0	0	0	0	0	0	0	0	0	0	0	0	0		3	3	0	0	2	0	1	0	0	0	0	0	0	0	0	0	0
338		1	1	46	0	1	94	0	0	0	0	0	0	0	0	0	0	0	0	0	0	0	0	0	0	0	0	0	0	0	0		2	3	0	0	0	0	0	0	0	0	0	0	0	0	0	0	0
339		0	1	46	0	0	0	0	0	0	0	1	0	0	0	0	0	0	0	0	0	0	0	0	0	0	0	0	0	0	0		3	3	0	0	2	2	0	0	0	0	0	0	0	0	0	0	0
340		0	1	40	0	1	225	0	0	0	0	0	0	0	0	0	0	0	0	0	0	0	0	0	0	0	0	0	0	0	0		2	3	0	0	0	0	1	0	2	0	0	0	0	0	0	0	0
341		1	1	47	0	1	0	0	0	0	0	0	0	0	0	0	0	0	0	0	0	0	0	0	0	0	0	0	0	0	0		3	3	0	0	0	2	0	0	0	0	0	0	0	0	0	0	0
342		0	1	54	0	0	0	0	0	0	0	1	12	1	5	0	0	0	0	0	0	0	0	1	12	0	0	0	0	0	0		3	3	0	0	2	2	1	0	1	0	0	0	0	0	0	0	0
343		1	2	72	0	1	155	0	0	0	0	1	155	1	155	0	0	0	0	0	0	0	0	1	155	0	0	0	0	0	0		3	4	0	0	0	2	1	0	0	1	6290	1	0	0	0	0	0
344		1	1	40	0	1	0	1	0	0	0	1	0	0	0	0	0	0	0	0	0	0	0	0	0	0	0	0	0	0	0		3	0	1	0	0	2	0	0	0	0	0	0	0	0	0	0	0
345		1	2	78	0	1	14	0	0	1	14	0	0	0	0	0	0	0	0	0	0	0	0	0	0	0	0	0	0	0	0		3	3	1	0	0	2	0	0	0	0	0	0	0	0	0	0	0
346		0	1	37	0	1	0	0	0	0	0	0	0	0	0	0	0	0	0	0	0	0	0	0	0	0	0	0	0	0	0		2	3	0	0	0	2	0	0	0	0	0	0	0	0	0	0	0
347		0	1	79	0	1	30	0	0	0	0	1	30	1	20	1	30	0	0	0	0	0	0	1	20	0	0	0	0	0	0		4	0	0	0	2	2	1	0	0	0	0	0	0	0	0	0	0
348		1	1	59	0	0	0	0	0	0	0	0	0	0	0	0	0	0	0	0	0	0	0	0	0	0	0	0	0	0	0		2	3	1	0	2	0	0	0	2	0	0	0	0	0	0	0	0
349		1	1	57	0	1	0	0	0	0	0	1	0	0	0	0	0	0	0	0	0	0	0	0	0	0	0	0	0	0	0		2	3	0	0	0	0	0	0	0	0	0	0	0	0	0	0	0
350		0	1	54	0	1	0	0	0	0	0	0	0	0	0	0	0	0	0	0	0	0	0	0	0	0	0	0	0	0	0		2	3	0	0	0	2	0	0	0	0	0	0	0	0	0	0	0
351		0	1	68	0	1	98	0	0	0	0	1	0	0	0	0	0	0	0	0	0	0	0	0	0	0	0	0	0	0	0		3	0	0	0	0	2	1	0	0	0	0	0	0	0	0	0	0
352		0	1	73	0	1	0	1	22	0	0	1	0	1	0	0	0	1	128	0	0	0	0	1	867	0	0	0	0	0	0		4	3	0	1	2	2	1	0	2	2	1892	1	1	1	0	0	0
353		1	2	63	0	0	0	0	0	0	0	0	0	0	0	0	0	0	0	0	0	0	0	0	0	0	0	0	0	0	0		1	0	0	0	0	2	1	0	0	0	0	0	0	0	0	0	0
354		1	1	62	0	1	0	1	0	0	0	1	0	0	0	0	0	0	0	0	0	0	0	0	0	0	0	0	0	0	0		3	3	1	0	2	2	1	0	0	0	0	0	0	0	0	0	0
355		0	2	68	0	1	0	1	0	1	0	1	0	1	0	0	0	0	0	0	0	0	0	0	0	0	0	0	0	0	0		3	0	1	0	1	2	1	1	2	0	0	0	0	0	0	0	0
356		1	1	61	0	1	0	1	0	0	0	0	0	0	0	0	0	1	143	0	0	0	0	1	143	1	114	0	0	0	0		3	4	0	0	2	2	1	0	1	0	0	0	0	0	0	0	0
357		0	1	47	0	0	0	0	0	0	0	0	0	0	0	0	0	0	0	0	0	0	0	0	0	0	0	0	0	0	0		2	3	0	0	0	0	0	0	0	0	0	0	0	0	0	0	0
358		0	2	57	0	1	0	1	0	0	0	1	0	0	0	1	0	0	0	0	0	0	0	0	0	0	0	0	0	0	0		3	3	0	0	2	2	1	0	0	0	0	0	0	0	0	0	0
359		1	1	54	0	0	0	0	0	0	0	0	0	0	0	0	0	0	0	0	0	0	0	0	0	0	0	0	0	0	0		3	3	1	0	2	2	1	1	0	0	0	0	0	0	0	0	0
360		1	1	61	0	1	0	0	0	0	0	0	0	0	0	0	0	0	0	0	0	0	0	0	0	0	0	0	0	0	0		2	3	0	0	2	2	1	0	2	0	0	0	0	0	0	0	0
361		1	2	60	0	0	0	1	210	0	0	0	0	0	0	0	0	0	0	0	0	0	0	0	0	0	0	0	0	0	0		2	1	0	0	0	0	0	0	0	0	0	0	0	0	0	0	0
362		0	1	59	0	1	115	0	0	0	0	1	115	0	0	0	0	0	0	0	0	0	0	0	0	0	0	0	0	0	0		3	3	0	0	2	2	0	0	2	0	0	0	0	0	0	0	0
363		0	2	63	0	1	11	0	0	0	0	1	0	1	0	0	0	0	0	0	0	0	0	0	0	0	0	0	0	0	0		3	3	1	0	2	2	1	0	1	0	0	0	0	0	0	0	0
364		1	1	54	0	0	0	0	0	0	0	0	0	0	0	0	0	0	0	0	0	0	0	0	0	0	0	0	0	0	0		3	3	0	0	0	2	1	0	0	0	0	0	0	0	0	0	0
365		0	2	68	0	1	167	0	0	0	0	1	33	1	33	0	0	0	0	0	0	0	0	0	0	0	0	0	0	0	0		3	3	0	0	0	2	0	0	0	0	0	0	0	0	0	0	0
366		1	2	77	0	1	371	0	0	0	0	1	371	0	0	0	0	0	0	0	0	0	0	0	0	0	0	0	0	0	0		3	0	0	0	0	0	0	0	0	0	0	0	0	0	0	0	0
367		1	2	77	0	0	0	0	0	0	0	1	2427	0	0	0	0	0	0	1	51	0	0	0	0	0	0	0	0	0	0		2	0	0	0	0	2	0	0	0	0	0	0	0	0	0	0	0
368		0	2	65	0	1	0	0	0	0	0	1	9	0	0	0	0	0	0	0	0	0	0	1	7	0	0	0	0	0	0		3	3	1	0	2	0	1	0	0	0	0	0	0	0	0	0	0
369		1	2	75	0	1	1478	0	0	0	0	1	1478	0	0	0	0	0	0	0	0	0	0	0	0	0	0	0	0	0	0		3	3	0	2	2	2	1	0	0	1	7294	1	0	0	0	0	0
370		1	1	67	0	1	186	0	0	0	0	1	307	0	0	1	307	0	0	0	0	0	0	1	307	0	0	0	0	0	0		3	3	0	2	2	2	1	0	2	0	0	0	0	0	0	0	0
371		1	1	78	0	1	0	0	0	0	0	1	0	0	0	0	0	0	0	0	0	0	0	0	0	0	0	0	0	0	0		2	0	0	0	0	2	0	0	0	0	0	0	0	0	0	0	0
374		1	1	41	0	1	73	0	0	0	0	1	0	0	0	0	0	0	0	0	0	0	0	0	0	0	0	0	0	0	0		1	2	0	0	0	0	0	0	0	0	0	0	0	0	0	0	0
372		1	2	69	0	1	1590	0	0	0	0	1	1590	0	0	1	1590	0	0	0	0	0	0	0	0	0	0	0	0	0	0		3	3	1	0	0	2	1	0	0	0	0	0	0	0	0	0	0
373		1	1	85	0	1	0	0	0	0	0	1	366	0	0	1	95	0	0	0	0	0	0	0	0	0	0	0	0	0	0		3	3	9	0	2	2	1	0	1	0	0	0	0	0	0	0	0
375		0	1	74	0	1	0	0	0	0	0	1	0	0	0	0	0	0	0	0	0	0	0	0	0	0	0	0	0	0	0		2	0	1	0	0	0	0	0	0	0	0	0	0	0	0	0	0
376		1	1	47	0	0	0	0	0	0	0	0	0	0	0	0	0	0	0	0	0	0	0	0	0	0	0	0	0	0	0		2	3	0	0	0	2	0	0	0	0	0	0	0	0	0	0	0
377		1	2	58	0	1	0	0	0	0	0	1	0	0	0	0	0	1	8	0	0	0	0	1	8	0	0	0	0	0	0		3	3	0	0	2	2	1	0	0	0	0	0	0	0	0	0	0
378		1	2	55	0	1	17	0	0	0	0	1	17	0	0	0	0	0	0	0	0	0	0	0	0	0	0	0	0	0	0		3	3	0	0	0	2	1	0	0	0	0	0	0	0	0	0	0
379		0	2	70	0	1	0	0	0	0	0	1	0	1	72	0	0	0	0	0	0	0	0	1	72	0	0	0	0	0	0		3	3	0	0	2	2	0	0	2	0	0	0	0	0	0	0	0
380		0	2	74	0	1	0	0	0	0	0	1	424	0	0	0	0	0	0	0	0	0	0	0	0	0	0	0	0	0	0		2	0	1	0	0	2	0	0	0	0	0	0	0	0	0	0	0
381		1	2	67	0	1	5314	1	1662	0	0	1	1662	1	566	1	1662	0	0	0	0	0	0	0	0	0	0	3	2392	0	0		3	0	1	0	9	2	1	0	0	0	0	0	0	0	0	0	0
382		1	1	50	0	0	0	0	0	0	0	1	0	0	0	0	0	0	0	0	0	0	0	0	0	0	0	0	0	0	0		2	3	0	0	0	2	0	0	0	0	0	0	0	0	0	0	0
383		1	1	48	0	1	29	0	0	0	0	0	0	0	0	0	0	0	0	0	0	0	0	0	0	0	0	0	0	0	0		3	0	1	0	0	0	0	0	0	0	0	0	0	0	0	0	0
384		1	1	49	0	1	294	0	0	0	0	1	294	0	0	0	0	0	0	0	0	0	0	0	0	0	0	0	0	0	0		2	0	0	0	1	0	0	0	0	0	0	0	0	0	0	0	0
385		0	1	61	0	1	2657	0	0	0	0	1	100	0	0	1	100	0	0	0	0	0	0	1	35	0	0	0	0	0	0		3	4	0	0	0	0	0	0	0	0	0	0	0	0	0	0	0
386		0	1	71	0	0	0	0	0	0	0	1	0	0	0	0	0	0	0	0	0	0	0	0	0	0	0	1	1179	0	0		3	3	0	0	2	0	0	0	0	0	0	0	0	0	0	0	0
387		0	1	50	0	1	0	0	0	0	0	1	0	0	0	0	0	0	0	0	0	0	0	0	0	0	0	0	0	0	0		3	0	0	0	0	2	1	0	0	0	0	0	0	0	0	0	0
388		0	2	77	0	1	0	0	0	0	0	1	0	0	0	0	0	0	0	0	0	0	0	0	0	0	0	0	0	0	0		2	3	0	0	0	2	0	0	0	0	0	0	0	0	0	0	0
389		1	1	37	0	1	17	0	0	0	0	1	17	1	17	0	0	0	0	1	0	0	0	0	0	0	0	0	0	0	0		3	0	0	0	0	0	0	0	0	0	0	0	0	0	0	0	0
390		0	1	64	0	1	0	0	0	0	0	1	0	0	0	0	0	0	0	0	0	0	0	0	0	0	0	0	0	0	0		3	3	0	0	2	2	1	0	0	0	0	0	0	0	0	0	0
391		1	2	60	0	1	0	0	0	0	0	1	0	0	0	0	0	0	0	0	0	0	0	0	0	0	0	0	0	0	0		3	3	0	0	0	2	0	0	0	0	0	0	0	0	0	0	0
392		1	2	79	0	1	0	1	0	0	0	1	0	0	0	0	0	0	0	1	141	0	0	0	0	0	0	0	0	0	0		3	3	0	0	0	2	1	0	0	0	0	0	0	0	0	0	0
393		1	2	79	0	1	0	1	0	1	0	1	0	0	0	1	0	0	0	0	0	0	0	0	0	0	0	0	0	0	0		2	3	0	0	0	2	1	0	0	0	0	0	0	0	0	0	0
394		0	2	75	0	1	0	0	0	0	0	1	0	0	0	0	0	0	0	0	0	0	0	0	0	0	0	0	0	0	0		3	3	0	2	2	2	2	0	0	0	0	0	0	0	0	0	0
395		0	1	50	0	1	147	0	0	0	0	1	147	0	0	0	0	0	0	0	0	0	0	0	0	0	0	0	0	0	0		3	4	1	0	2	0	0	0	2	0	0	0	0	0	0	0	0
396		0	1	60	0	0	0	0	0	0	0	0	0	0	0	0	0	0	0	0	0	0	0	0	0	0	0	0	0	0	0		2	3	0	0	0	0	1	0	1	0	0	0	0	0	0	0	0
397		0	2	58	0	1	0	0	0	0	0	1	0	0	0	1	63	0	0	0	0	0	0	1	63	0	0	0	0	0	0		3	3	1	0	0	2	0	0	0	0	0	0	0	0	0	0	0
398		1	2	53	0	1	84	0	0	0	0	1	84	0	0	0	0	0	0	0	0	0	0	0	0	0	0	0	0	0	0		3	0	0	0	1	1	0	0	0	0	0	0	0	0	0	0	0
399		0	1	59	0	1	0	0	0	0	0	1	0	0	0	0	0	0	0	0	0	0	0	0	0	0	0	0	0	0	0		3	0	0	0	2	0	0	0	2	0	0	0	0	0	0	0	0
400		0	1	69	0	0	0	0	0	0	0	0	0	0	0	0	0	0	0	0	0	0	0	0	0	0	0	0	0	0	0		2	0	0	0	0	0	0	0	0	0	0	0	0	0	0	0	0
401		0	2	55	0	0	0	0	0	0	0	1	0	0	0	0	0	0	0	0	0	0	0	0	0	0	0	0	0	0	0		3	3	1	0	2	0	0	0	0	0	0	0	0	0	0	0	0
402		1	2	71	0	1	0	0	0	0	0	1	0	0	0	0	0	0	0	0	0	0	0	0	0	0	0	0	0	0	0		2	3	9	9	9	2	1	9	0	0	0	0	0	0	0	0	0
403		1	2	56	0	1	2562	0	0	0	0	1	0	0	0	0	0	0	0	0	0	0	0	0	0	0	0	0	0	0	0		2	0	1	0	0	0	0	0	1	0	0	0	0	0	0	0	0
404		1	2	40	0	1	1107	0	0	0	0	1	0	0	0	0	0	0	0	0	0	0	0	0	0	0	0	0	0	0	0		3	3	0	0	1	2	0	0	0	0	0	0	0	0	0	0	0
405		1	1	45	0	1	653	0	0	0	0	1	653	0	0	1	653	0	0	0	0	0	0	0	0	0	0	0	0	0	0		3	3	0	0	0	2	0	1	0	0	0	0	0	0	0	0	0
406		0	1	76	0	1	164	0	0	0	0	1	164	0	0	1	0	0	0	0	0	0	0	1	42	0	0	0	0	0	0		3	3	1	0	0	2	1	0	0	0	0	0	0	0	0	0	0
407		0	1	59	0	1	755	0	0	0	0	1	3128	0	0	1	85	0	0	0	0	0	0	0	0	0	0	0	0	0	0		2	3	0	0	1	2	1	0	2	0	0	0	0	0	0	0	0
408		0	1	76	0	0	0	0	0	0	0	1	0	0	0	1	0	0	0	0	0	0	0	0	0	0	0	0	0	0	0		3	3	0	0	2	2	1	0	0	0	0	0	0	0	0	0	0
409		1	1	72	0	1	0	0	0	0	0	1	0	0	0	0	0	0	0	0	0	0	0	0	0	0	0	0	0	0	0		3	3	0	0	2	2	0	0	0	0	0	0	0	0	0	0	0
410		1	2	61	0	0	0	0	0	0	0	0	0	0	0	0	0	1	21	0	0	0	0	1	21	0	0	1	11	1	0		4	0	9	2	2	2	0	0	9	0	0	0	0	0	0	0	0
413		0	1	51	0	1	0	0	0	0	0	1	0	0	0	0	0	0	0	0	0	0	0	0	0	0	0	0	0	0	0		3	3	0	0	0	0	1	0	0	0	0	0	0	0	0	0	0
411		1	1	70	0	0	0	0	0	0	0	0	0	0	0	0	0	1	1780	0	0	0	0	0	0	0	0	0	0	0	0		2	0	0	0	2	2	0	0	0	1	1598	2	1	0	0	0	0
412		0	2	75	0	0	0	1	0	0	0	1	0	0	0	0	0	0	0	0	0	0	0	1	18	0	0	0	0	0	0		3	3	0	0	0	0	1	0	0	0	0	0	0	0	0	0	0
414		0	2	77	0	1	0	0	0	0	0	1	363	0	0	0	0	0	0	1	7	0	0	0	0	0	0	0	0	0	0		3	3	0	0	0	2	0	0	0	0	0	0	0	0	0	0	0
415		1	2	73	0	1	92	0	0	0	0	1	0	1	36617	0	0	0	0	0	0	0	0	0	0	0	0	0	0	0	0		3	0	0	0	2	2	1	0	2	0	0	0	0	0	0	0	0
416		0	2	63	0	1	0	0	0	0	0	0	0	0	0	0	0	0	0	0	0	0	0	1	38	0	0	0	0	0	0		3	3	0	0	2	0	1	0	0	0	0	0	0	0	0	0	0
417		1	1	73	0	1	0	1	0	0	0	1	0	0	0	0	0	0	0	0	0	0	0	0	0	0	0	0	0	0	0		3	0	0	0	0	2	0	1	2	0	0	0	0	0	0	0	0
418		0	1	39	0	1	44	0	0	0	0	1	30	1	30	0	0	0	0	0	0	0	0	0	0	0	0	0	0	0	0		3	0	1	0	0	0	1	0	1	0	0	0	0	0	0	0	0
419		1	1	70	0	1	0	1	0	0	0	1	0	0	0	0	0	1	2	0	0	0	0	1	0	0	0	0	0	0	0		4	0	0	0	0	0	0	0	1	0	0	0	0	0	0	0	0
420		0	1	77	0	1	0	0	0	0	0	1	0	0	0	0	0	0	0	0	0	0	0	0	0	0	0	0	0	0	0		3	3	0	0	0	2	0	0	0	0	0	0	0	0	0	0	0
421		1	1	58	0	0	0	1	0	0	0	0	0	0	0	0	0	0	0	0	0	0	0	0	0	0	0	0	0	0	0		3	3	0	0	2	2	0	0	1	0	0	0	0	0	0	0	0
422		1	1	70	0	1	316	0	0	0	0	0	0	0	0	0	0	0	0	1	114	0	0	0	0	0	0	0	0	0	0		2	0	0	0	0	2	0	0	0	0	0	0	0	0	0	0	0
423		1	2	61	0	1	29	0	0	0	0	1	29	0	0	0	0	0	0	1	0	0	0	0	0	0	0	0	0	0	0		2	0	0	0	0	0	0	0	0	0	0	0	0	0	0	0	0
424		0	1	52	0	1	0	0	0	0	0	0	0	1	0	0	0	0	0	0	0	0	0	0	0	0	0	0	0	0	0		2	3	0	0	0	2	0	0	0	0	0	0	0	0	0	0	0
425		1	1	62	0	1	0	0	0	0	0	1	0	1	0	0	0	0	0	0	0	0	0	0	0	0	0	0	0	0	0		2	3	0	0	0	2	0	0	2	0	0	0	0	0	0	0	0
426		1	2	79	0	0	0	0	0	0	0	0	0	0	0	0	0	0	0	0	0	0	0	0	0	0	0	0	0	0	0		3	3	0	0	2	2	1	0	0	0	0	0	0	0	0	0	0
427		1	1	74	0	1	0	0	0	0	0	1	0	0	0	0	0	0	0	0	0	0	0	0	0	0	0	0	0	0	0		3	3	0	2	0	2	1	1	0	0	0	0	0	0	0	0	0
428		1	1	45	0	1	1172	0	0	0	0	0	0	0	0	0	0	0	0	1	45	0	0	0	0	0	0	0	0	0	0		2	0	0	0	0	0	0	0	1	0	0	0	0	0	0	0	0
429		0	2	48	0	0	0	1	0	0	0	1	0	0	0	0	0	0	0	0	0	0	0	0	0	0	0	0	0	0	0		2	3	0	0	0	1	0	0	0	0	0	0	0	0	0	0	0
430		1	1	75	0	1	0	0	0	0	0	1	0	0	0	0	0	0	0	0	0	0	0	0	0	0	0	0	0	0	0		2	3	0	0	2	2	0	0	0	0	0	0	0	0	0	0	0
431		0	1	39	0	0	0	0	0	0	0	1	0	0	0	0	0	0	0	1	1894	0	0	0	0	0	0	0	0	0	0		2	3	1	0	0	2	0	0	0	0	0	0	0	0	0	0	0
432		1	1	83	0	1	0	0	0	0	0	1	108	0	0	0	0	0	0	0	0	0	0	1	108	0	0	0	0	0	0		3	0	0	0	2	2	1	0	0	0	0	0	0	0	0	0	0
433		0	2	69	0	1	0	1	0	0	0	1	0	0	0	0	0	0	0	0	0	0	0	0	0	0	0	0	0	0	0		2	3	0	2	2	2	1	0	0	0	0	0	0	0	0	0	0
436		0	1	69	0	1	0	0	0	0	0	1	0	0	0	0	0	0	0	0	0	0	0	0	0	0	0	0	0	0	0		2	2	0	0	0	0	1	1	0	0	0	0	0	0	0	0	0
435		0	1	71	0	1	108	0	0	0	0	1	108	0	0	0	0	0	0	0	0	0	0	0	0	0	0	0	0	0	0		2	3	0	0	0	0	0	0	0	0	0	0	0	0	0	0	0
434		0	2	78	0	1	0	0	0	0	0	1	0	1	0	1	27	0	0	0	0	0	0	1	27	0	0	0	0	0	0		3	3	0	2	0	2	0	0	0	0	0	0	0	0	0	0	0
437		0	1	71	0	1	512	0	0	0	0	1	512	0	0	0	0	0	0	0	0	0	0	0	0	0	0	0	0	0	0		3	3	0	0	2	2	1	1	2	0	0	0	0	0	0	0	0
438		1	1	75	0	1	7313	0	0	0	0	1	7313	0	0	0	0	0	0	0	0	1	1834	0	0	0	0	0	0	0	0		2	3	0	0	0	2	1	0	0	0	0	0	0	0	0	0	0
439		1	2	57	0	1	0	0	0	0	0	1	0	0	0	0	0	0	0	0	0	0	0	0	0	0	0	0	0	0	0		2	3	1	0	0	2	1	0	2	0	0	0	0	0	0	0	0
440		1	2	74	0	1	256	0	0	0	0	1	256	0	0	0	0	0	0	0	0	0	0	0	0	0	0	0	0	0	0		2	3	1	0	2	0	0	0	2	0	0	0	0	0	0	0	0
441		1	2	78	0	0	0	0	0	0	0	0	0	0	0	0	0	1	889	0	0	0	0	0	0	0	0	0	0	0	0		3	3	0	3	2	2	1	1	0	0	0	0	0	0	0	0	0
442		1	1	37	0	0	0	0	0	0	0	0	0	0	0	0	0	0	0	0	0	0	0	0	0	0	0	0	0	0	0		3	4	0	0	0	2	0	1	0	0	0	0	0	0	0	0	0
443		1	2	32	0	0	0	0	0	0	0	0	0	0	0	0	0	0	0	0	0	0	0	0	0	0	0	0	0	0	0		1	3	0	0	0	0	0	0	0	0	0	0	0	0	0	0	0
444		0	1	55	0	0	0	0	0	0	0	0	0	0	0	0	0	0	0	0	0	0	0	0	0	0	0	0	0	0	0		1	3	0	0	0	0	0	0	0	0	0	0	0	0	0	0	0
445		1	1	56	0	1	0	0	0	0	0	1	0	0	0	0	0	0	0	0	0	0	0	0	0	1	684	1	714	0	0		3	3	0	0	2	2	1	0	0	0	0	0	0	0	0	0	0
446		1	1	53	0	0	0	0	0	0	0	0	0	0	0	0	0	0	0	0	0	0	0	0	0	0	0	0	0	0	0		2	3	0	0	0	0	0	0	0	0	0	0	0	0	0	0	0
447		1	2	75	0	1	2438	1	276	0	0	1	2438	0	0	1	-272	0	0	0	0	0	0	0	0	0	0	0	0	0	0		3	0	9	2	0	2	0	0	0	0	0	0	0	0	0	0	0
448		1	1	46	0	0	0	0	0	0	0	0	0	0	0	0	0	0	0	0	0	0	0	0	0	0	0	0	0	0	0		3	3	0	0	0	0	0	0	0	0	0	0	0	0	0	0	0
449		0	2	71	0	1	2038	1	2038	0	0	1	2038	0	0	1	577	1	212	1	212	0	0	1	89	1	59	0	0	0	0		4	3	0	1	2	2	1	1	0	1	1127	1	1	0	0	0	0
450		0	1	72	0	1	0	0	0	0	0	1	0	0	0	0	0	0	0	0	0	0	0	1	179	0	0	0	0	0	0		3	3	0	2	2	2	0	1	0	1	616	2	1	1	0	0	0
451		0	1	60	0	1	0	0	0	0	0	0	0	0	0	0	0	0	0	0	0	0	0	0	0	0	0	0	0	0	0		3	3	0	0	0	2	0	0	0	0	0	0	0	0	0	0	0
452		0	1	69	0	0	0	0	0	0	0	0	0	0	0	0	0	0	0	0	0	0	0	0	0	0	0	0	0	0	0		3	2	0	0	2	2	0	0	0	0	0	0	0	0	0	0	0
453		1	2	59	0	1	0	0	0	0	0	0	0	0	0	0	0	1	0	0	0	0	0	1	14	0	0	0	0	0	0		3	0	0	0	0	2	0	0	1	0	0	0	0	0	0	0	0
454		1	1	64	0	1	0	0	0	0	0	1	0	1	0	0	0	0	0	0	0	0	0	1	38	0	0	0	0	0	0		3	3	0	0	0	2	1	0	0	0	0	0	0	0	0	0	0
[truncated: 348 more columns]
